# Supplementary material for: Role of LptD in Resistance to Glutaraldehyde and Pathogenicity in Riemerella anatipestifer
Source: Front Microbiol. 2019 Jun 21;10:1443. doi: 10.3389/fmicb.2019.01443 (PMC6598057; doi:10.3389/fmicb.2019.01443)
Supplement: Supplementary file 3 [file Data_Sheet_1.xlsx]

## Sheet: CH_1TSBvsCH_ATSB.DEG_up
Supplementary Table S1 Compared to R. anatipestifer ATCC11845, the up-regulated genes in CH-1 in TSB
Gene_id	readcount_CH_1TSB	readcount_CH_ATSB	log2.Fold_change.	pvalue	qvalue	Genename	Description
13715108	63.4333	0	6.9872	4.73e-18	1.71e-18	B739_0002	hypothetical protein
13715109	29.6454	0	5.8897	1.07e-09	2.55e-10	B739_0003	hypothetical protein
13715110	22.2664	0	7.1602	3.48e-07	7.02e-08	B739_0004	hypothetical protein
13715111	47.1219	0	6.5583	3.62e-14	1.09e-14	B739_0005	phospholipid-binding protein				transcriptional regulator
13715112	89.4539	0	7.4831	7.6e-24	3.45e-24	B739_0006	hypothetical protein
13715113	247.002	0	8.9484	2.03e-53	2.16e-53	B739_0007	hypothetical protein
13715114	104.989	0	7.7141	4e-27	2.06e-27	B739_0008	hypothetical protein
13715115	491.285	0	9.9404	8.51e-91	1.73e-90	B739_0009	hypothetical protein
13715120	44.2739	0	6.4684	1.83e-13	5.35e-14	B739_0014	hypothetical protein
13715121	62.7861	0	6.9724	6.68e-18	2.38e-18	B739_0015	hypothetical protein
13715122	220.334	0	8.7835	7.52e-49	7.37e-49	B739_0016	hypothetical protein
13715123	141.107	0	8.1406	2.35e-34	1.51e-34	B739_0017	hypothetical protein
13715124	137.741	0	8.1058	1.06e-33	6.65e-34	B739_0018	hypothetical protein
13715127	526.885	0	10.041	9.2e-96	2.04e-95	B739_0021	hypothetical protein
13715128	98.6453	0	9.3076	2.38e-21	9.86e-22	B739_0022	hypothetical protein
13715131	312.506	0	9.2877	3.86e-64	5.05e-64	B739_0026	hypothetical protein
13715132	109.002	0	7.7682	5.93e-28	3.17e-28	B739_0027	hypothetical protein
13715134	139.942	0	8.1287	3.95e-34	2.53e-34	B739_0029	Co/Zn/Cd efflux system protein
13715135	13.2045	0	4.723	4.89e-05	8.41e-06	B739_0030	hypothetical protein
13715136	36.5065	0	5.5516	1.11e-11	2.95e-12	B739_0031	Beta-lactamase class
13715137	67.4465	0	7.0757	5.66e-19	2.13e-19	B739_0032	hypothetical protein
13715138	21.1013	0	5.3993	2.39e-07	4.85e-08	B739_0033	hypothetical protein
13715139	113.144	0	7.822	8.41e-29	4.62e-29	B739_0034	hypothetical protein
13715140	13.5929	0	4.7648	3.73e-05	6.45e-06	B739_0035	hypothetical protein
13715141	249.073	0	8.9604	9.1e-54	9.76e-54	B739_0036	hypothetical protein
13715147	153.146	0	8.2588	1.15e-36	7.92e-37	B739_0042	hypothetical protein
13715148	75.2138	0	7.2329	9.98e-21	4.01e-21	B739_0043	hypothetical protein
13715149	63.3039	0	6.9842	5.07e-18	1.82e-18	B739_0044	hypothetical protein
13715150	106.801	0	7.7388	1.69e-27	8.77e-28	B739_0045	hypothetical protein
13715151	88.9361	0	7.4747	9.83e-24	4.42e-24	B739_0046	hypothetical protein
13715152	73.6603	0	7.2028	2.22e-20	8.82e-21	B739_0047	hypothetical protein
13715153	200.527	0	8.6477	2.29e-45	2.08e-45	B739_0048	hypothetical protein
13715154	66.1519	0	7.0477	1.12e-18	4.16e-19	B739_0049	Beta-glucanase/Beta-glucan synthetase
13715155	95.7973	0	7.5819	3.37e-25	1.59e-25	B739_0050	hypothetical protein
13715156	83.6284	0	7.3859	1.39e-22	6.07e-23	B739_0051	hypothetical protein
13715157	104.859	0	7.7123	4.25e-27	2.18e-27	B739_0052	hypothetical protein
13715158	12.9456	0	4.6944	5.86e-05	1e-05	B739_0053	hypothetical protein
13715159	11.3921	0	6.1934	0.00017016	2.81e-05	B739_0054	hypothetical protein
13715163	161.043	78.6149	1.0346	3.04e-14	9.2e-15	B739_0058	7-keto-8-aminopelargonate synthetase-related enzyme
13715165	77.0262	23.6623	1.7028	8.47e-12	2.26e-12	B739_0060	hypothetical protein
13715166	123.371	40.475	1.6079	4.66e-17	1.61e-17	B739_0061	Methionine synthase I, cobalamin-binding domain-containing protein
13715167	82.4633	27.7098	1.5734	1.15e-11	3.05e-12	B739_0062	Methionine synthase I, cobalamin-binding domain-containing protein
13715170	66.6697	0	7.059	8.52e-19	3.19e-19	B739_0065	hypothetical protein
13715171	6.7317	0	3.751	0.0053888	0.0007658	B739_0067	hypothetical protein
13715173	42.591	0	6.4125	4.81e-13	1.37e-13	B739_0069	response regulator T Signal transduction mechanisms
13715174	21.878	0	5.4514	1.44e-07	3e-08	B739_0070	hypothetical protein
13715175	110.685	0	7.7903	2.68e-28	1.46e-28	B739_0071	hypothetical protein
13715176	5.82551	0	4.2258	0.0079126	0.0011064	B739_0072	hypothetical protein
13715177	96.0562	47.4803	1.0166	6.16e-09	1.4e-09	B739_0073	hypothetical protein
13715179	187.97	30.0449	2.6453	3.83e-39	2.94e-39	B739_0075	hypothetical protein
13715180	246.095	14.1662	4.1187	3.76e-66	5.04e-66	B739_0076	hypothetical protein
13715181	380.212	160.655	1.2428	6.38e-38	4.58e-38	B739_0077	hypothetical protein
13715183	162.726	18.3694	3.1471	1.36e-38	1.02e-38	B739_0079	hypothetical protein
13715184	158.842	37.2059	2.094	1.87e-27	9.66e-28	B739_0080	hypothetical protein
13715185	181.368	49.971	1.8598	6.3e-28	3.35e-28	B739_0081	hypothetical protein
13715186	394.97	140.261	1.4936	2.22e-47	2.14e-47	B739_0082	MoxR-like ATPase
13715194	72.7541	0	7.185	3.55e-20	1.39e-20	B739_0090	hypothetical protein
13715197	110.555	33.781	1.7105	2.36e-16	7.85e-17	B739_0093	hypothetical protein
13715198	328.3	158.164	1.0536	6.43e-28	3.41e-28	B739_0094	hypothetical protein
13715201	88.2888	32.38	1.4471	1.78e-11	4.66e-12	B739_0097	hypothetical protein
13715209	63.045	20.2375	1.6394	1.35e-09	3.22e-10	B739_0105	hypothetical protein
13715216	6853.13	1459.9	2.2309	0	0	B739_0112	hypothetical protein
13715222	40.7786	17.7467	1.2003	3.51e-05	6.09e-06	B739_0118	hypothetical protein
13715224	558.731	0	10.126	3.97e-100	9.27e-100	B739_0120	hypothetical protein
13715225	110.426	0	7.7869	3.02e-28	1.64e-28	B739_0121	hypothetical protein
13715228	23.1726	3.26913	2.8254	2.41e-06	4.57e-07	B739_0124	hypothetical protein
13715229	20.1951	0	5.3359	4.32e-07	8.61e-08	B739_0125	hypothetical protein
13715230	14.6285	0	4.8707	1.82e-05	3.24e-06	B739_0126	hypothetical protein
13715238	51.3939	3.58048	3.8434	1.04e-14	3.22e-15	B739_0134	hypothetical protein
13715239	16.4409	0	6.7226	8.56e-06	1.56e-06	-//-
13715240	9.19136	0	4.2003	0.00086136	0.0001331	B739_0136	hypothetical protein
13715241	14.1107	0	4.8187	2.6e-05	4.57e-06	B739_0137	hypothetical protein
13715242	67.0581	0	7.0673	6.94e-19	2.61e-19	B739_0138	hypothetical protein
13715243	11.1332	0	4.4768	0.00021129	3.45e-05	B739_0139	hypothetical protein
13715244	8.80299	0	4.138	0.0011457	0.00017419	B739_0140	hypothetical protein
13715245	103.824	0	7.698	6.98e-27	3.57e-27	B739_0141	hypothetical protein
13715247	297.619	134.034	1.1509	8.14e-28	4.28e-28	B739_0143	hypothetical protein
13715249	295.289	66.3167	2.1547	7.22e-51	7.43e-51	B739_0145	Muramidase (flagellum-specific)
13715250	64.7279	13.0765	2.3074	4.31e-13	1.24e-13	B739_0146	hypothetical protein
13715254	37.0244	2.95779	3.6459	9.25e-11	2.34e-11	B739_0150	hypothetical protein
13715255	55.2776	8.095	2.7716	4.83e-13	1.38e-13	B739_0151	Uracil DNA glycosylase
13715263	44.015	18.2137	1.273	9.18e-06	1.67e-06	B739_0159	hypothetical protein
13715274	148.486	72.0766	1.0427	2.39e-13	6.94e-14	B739_0170	transcriptional regulator
13715284	53.7241	0	8.4309	1.21e-13	3.58e-14	B739_0180	hypothetical protein
13715285	55.1482	0	6.7852	4.16e-16	1.36e-16	B739_0181	hypothetical protein
13715286	16.6998	6.22692	1.4232	0.0037507	0.00054498	B739_0182	hypothetical protein
13715287	38.06	6.07125	2.6482	3.82e-09	8.84e-10	B739_0183	hypothetical protein
13715288	16.4409	0	5.0392	5.27e-06	9.72e-07	B739_0184	hypothetical protein
13715289	6.60224	0	3.8214	0.0056316	0.00079881	B739_0185	Cytochrome c551/c552
13715290	19.6773	0	4.6599	7.41e-07	1.46e-07	B739_0186	hypothetical protein
13715291	128.938	3.26913	5.3016	2.37e-37	1.67e-37	B739_0187	hypothetical protein
13715292	17.7354	0	5.832	2.34e-06	4.45e-07	B739_0188	hypothetical protein
13715293	9.96809	0	4.3173	0.00048898	7.74e-05	B739_0189	hypothetical protein
13715294	42.9793	0	6.4256	3.85e-13	1.11e-13	B739_0190	hypothetical protein
13715295	26.0206	0	5.7016	1.02e-08	2.28e-09	B739_0191	hypothetical protein
13715296	35.8593	0	6.1643	2.48e-11	6.44e-12	B739_0192	hypothetical protein
13715297	132.045	7.00529	4.2364	1.12e-36	7.74e-37	B739_0193	hypothetical protein
13715299	6.60224	0	3.723	0.005946	0.00083919	B739_2166	hypothetical protein
13715300	131.657	0	8.0406	1.65e-32	9.88e-33	B739_2167	hypothetical protein
13715305	19.4184	3.73615	2.3778	5.78e-05	9.88e-06	B739_2172	hypothetical protein
13715322	166.221	72.855	1.19	9.08e-17	3.09e-17	B739_2189	protein release subunit factor B
13715325	485.589	242.227	1.0034	1.59e-38	1.18e-38	B739_2192	protease subunit of ATP-dependent Clp protease
13715326	40.1313	8.87336	2.1772	2.75e-08	5.99e-09	B739_2193	hypothetical protein
13715327	56.4427	15.8786	1.8297	1.34e-09	3.2e-10	B739_2194	hypothetical protein
13715340	7.24952	0	3.8579	0.0036427	0.00052997	B739_2207	hypothetical protein
13715341	167.516	0	8.3882	2.29e-39	1.77e-39	B739_2208	hypothetical protein
13715342	428.628	0	9.7436	8.26e-82	1.47e-81	B739_2209	hypothetical protein
13715343	247.649	0	8.9522	1.58e-53	1.69e-53	B739_2210	hypothetical protein
13715346	139.553	24.4407	2.5135	2.41e-28	1.31e-28	B739_2213	hypothetical protein
13715347	182.533	0	8.512	3.96e-42	3.32e-42	B739_2214	hypothetical protein
13715349	141.366	0	8.1433	2.09e-34	1.35e-34	B739_0135	hypothetical protein
13715357	1126.78	436.196	1.3692	1.97e-120	5.86e-120	-//-
13715359	80.1331	0	7.3243	8.1e-22	3.41e-22	B739_1053	hypothetical protein
13715365	23.0431	0	7.2097	2.31e-07	4.7e-08	B739_1434	hypothetical protein
13715366	97.998	11.2085	3.1282	8.19e-24	3.7e-24	B739_1450	hypothetical protein
13715368	8.54408	2.80211	1.6084	0.027139	0.0036055	-//-
13715369	194.443	42.4987	2.1939	1.24e-34	8.11e-35	B739_1524	hypothetical protein
13715372	86.4765	0	9.1176	2.25e-19	8.62e-20	B739_1635	site-specific recombinase XerD
13715374	30.5516	0	5.9332	6.12e-10	1.48e-10	B739_0001	hypothetical protein
13715379	213.214	64.6043	1.7226	2.91e-30	1.66e-30	B739_1386	hypothetical protein
13715401	521.06	240.826	1.1135	7.66e-46	7.05e-46	B739_0860	tmRNA-binding protein
13715409	185.64	1.7124	6.7603	1.91e-50	1.94e-50	B739_0868	hypothetical protein
13715410	385.131	153.182	1.3301	3.94e-41	3.21e-41	B739_0869	hypothetical protein
13715411	286.615	43.8998	2.7068	8.12e-60	9.88e-60	B739_0870	hypothetical protein
13715412	333.866	117.533	1.5062	1.17e-40	9.43e-41	B739_0871	hypothetical protein
13715413	146.285	59.3114	1.3024	2.71e-16	8.98e-17	B739_0872	hypothetical protein
13715417	199.362	85.1531	1.2273	2.07e-20	8.25e-21	B739_0876	hypothetical protein
13715418	1055.06	160.81	2.7139	1.63e-215	1.03e-214	B739_0877	hypothetical protein
13715419	42.332	14.6333	1.5325	1.61e-06	3.11e-07	B739_0878	hypothetical protein
13715423	46.863	10.2744	2.1894	1.74e-09	4.11e-10	B739_0882	hypothetical protein
13715441	41.4258	0	6.3725	9.43e-13	2.63e-13	B739_0900	acetyltransferase
13715446	10.4859	1.08971	3.2664	0.00084243	0.00013053	B739_0906	hypothetical protein
13715448	59.5497	0	6.896	3.8e-17	1.31e-17	B739_0908	hypothetical protein
13715449	77.4146	0	7.2745	3.23e-21	1.32e-21	B739_0909	hypothetical protein
13715453	51.9118	22.5726	1.2015	2.99e-06	5.65e-07	B739_0913	hypothetical protein
13715456	93.4671	23.1953	2.0106	3.13e-16	1.03e-16	B739_0916	hydrolase
13715458	104.859	51.5278	1.025	1.06e-09	2.54e-10	B739_0918	ATPase of the PP-loop superfamily implicated in cell cycle control
13715462	222.923	82.818	1.4285	2.65e-26	1.32e-26	B739_0922	hypothetical protein
13715467	1144.13	386.38	1.5662	1.99e-140	6.93e-140	B739_0927	Trypsin-like serine protease
13715477	255.805	0	8.9989	6.74e-55	7.3e-55	B739_0937	hypothetical protein
13715478	19.5478	0	5.2889	6.61e-07	1.31e-07	-//-
13715483	47.6397	17.7467	1.4246	9.69e-07	1.89e-07	B739_0943	hypothetical protein
13715487	105.765	44.9895	1.2332	1.37e-11	3.61e-12	B739_0947	hypothetical protein
13715488	108.096	33.6254	1.6847	8.43e-16	2.72e-16	B739_0948	ABC transporter involved in cytochrome c biogenesis permease
13715498	72.6247	32.38	1.1654	5.45e-08	1.18e-08	B739_0958	hypothetical protein
13715500	211.531	0	8.7247	2.59e-47	2.48e-47	B739_0960	hypothetical protein
13715503	35.212	9.96307	1.8214	1.78e-06	3.43e-07	B739_0963	Nucleotide-binding protein implicated in inhibition of septum formation
13715504	132.174	0	8.0463	1.3e-32	7.85e-33	B739_0964	hypothetical protein
13715540	254.122	58.066	2.1298	1.44e-43	1.26e-43	B739_1000	hypothetical protein					namely RA0C_1121, lptD
13715541	304.739	99.1637	1.6197	4.87e-40	3.86e-40	B739_1001	N-acetylmuramoyl-L-alanine amidase
13715548	76.8967	34.5594	1.1538	2.64e-08	5.76e-09	B739_1008	hypothetical protein
13715551	95.7973	42.3431	1.1779	3.41e-10	8.34e-11	B739_1012	hypothetical protein
13715552	65.7635	0	7.0392	1.37e-18	5.08e-19	B739_1013	hypothetical protein
13715553	26.5384	0	5.73	7.37e-09	1.66e-09	B739_1014	cell wall biogenesis glycosyltransferase
13715555	61.6209	18.5251	1.7339	7.02e-10	1.7e-10	B739_1016	hypothetical protein
13715556	83.8873	22.5726	1.8939	5.6e-14	1.68e-14	B739_1017	hypothetical protein
13715557	102.788	38.9183	1.4012	9.89e-13	2.76e-13	B739_1018	serine acetyltransferase
13715559	41.1669	10.2744	2.0024	6.29e-08	1.35e-08	B739_1020	hypothetical protein
13715561	80.1331	15.4116	2.3784	3.07e-16	1.01e-16	B739_1022	hypothetical protein
13715564	552.129	223.235	1.3064	3.87e-57	4.31e-57	B739_1025	ATPase
13715565	100.458	47.3246	1.0859	7.42e-10	1.79e-10	B739_1026	ATPase
13715567	18572.5	1.24538	13.864	0	0	B739_1028	hypothetical protein
13715568	3022.53	0	12.562	0	0	B739_1029	hypothetical protein
13715569	1863.77	511.853	1.8644	4.57e-271	4.14e-270	B739_1030	Glutamyl- and glutaminyl-tRNA synthetase
13715576	50.8761	19.6148	1.375	6.77e-07	1.34e-07	B739_1037	hypothetical protein
13715578	100.587	31.913	1.6562	1.4e-14	4.33e-15	B739_1039	hypothetical protein
13715579	448.046	0	9.8075	1.25e-84	2.35e-84	B739_1040	hypothetical protein
13715580	28.8686	0	5.8514	1.72e-09	4.07e-10	B739_1041	hypothetical protein
13715585	26.0206	0	5.7016	1.02e-08	2.28e-09	B739_1046	hypothetical protein
13715586	73.272	1.55673	5.5567	6.46e-22	2.75e-22	B739_1047	hypothetical protein
13715588	110.037	31.913	1.7858	6.15e-17	2.1e-17	B739_1049	hypothetical protein
13715596	125.443	50.7494	1.3056	3.2e-14	9.7e-15	B739_1057	hypothetical protein
13715599	296.972	44.5225	2.7377	1.88e-62	2.4e-62	B739_1061	hypothetical protein
13715604	16.8293	0	5.0729	4.06e-06	7.58e-07	B739_1066	hypothetical protein
13715606	418.531	203.465	1.0406	1.08e-34	7.09e-35	B739_1068	hypothetical protein
13715611	633.557	102.9	2.6222	1.02e-126	3.21e-126	B739_1073	ATPase
13715620	80.1331	34.8708	1.2004	6.6e-09	1.5e-09	B739_1082	Ferredoxin
13715622	21.1013	0	5.3993	2.39e-07	4.85e-08	B739_1084	hypothetical protein
13715624	51.7823	7.93932	2.7054	4.16e-12	1.13e-12	B739_1086	hypothetical protein
13715625	16.5703	0	5.0505	4.83e-06	8.94e-07	B739_1087	hypothetical protein
13715626	40.2607	0	6.3313	1.86e-12	5.13e-13	B739_1088	hypothetical protein
13715631	43.7561	2.3351	4.2279	3.36e-13	9.72e-14	B739_1094	hypothetical protein
13715632	154.829	50.5937	1.6136	4.43e-21	1.81e-21	B739_1095	hypothetical protein
13715636	110.296	15.4116	2.8393	6.48e-25	3.03e-25	B739_1099	nucleotidyltransferase/DNA polymerase
13715640	34.5647	11.8311	1.5467	1.33e-05	2.39e-06	B739_1103	Ribonuclease HII
13715643	487.919	112.24	2.1201	1.2e-81	2.12e-81	B739_1106	hypothetical protein
13715645	43.4971	0	6.4428	2.86e-13	8.28e-14	B739_1108	hypothetical protein
13715646	45.6979	0	6.5141	8.12e-14	2.42e-14	B739_1109	hypothetical protein
13715647	95.5384	0	7.578	3.83e-25	1.8e-25	B739_1110	hypothetical protein
13715654	51.9118	13.8549	1.9057	3e-09	7e-10	B739_1117	intracellular protease/amidase
13715655	54.3714	20.3932	1.4148	1.85e-07	3.82e-08	B739_1118	hypothetical protein
13715661	211.142	102.9	1.037	3.05e-18	1.11e-18	B739_1124	hypothetical protein
13715664	293.994	0	9.8831	1.51e-55	1.66e-55	B739_1127	UDP-N-acetyl-D-mannosaminuronate dehydrogenase
13715665	119.099	0	7.896	5.22e-30	2.95e-30	B739_1128	hypothetical protein
13715666	106.672	0	7.737	1.79e-27	9.31e-28	B739_1129	hypothetical protein
13715667	77.6735	0	7.2793	2.83e-21	1.16e-21	B739_1130	hypothetical protein
13715668	89.3245	0	7.481	8.11e-24	3.67e-24	B739_1131	hypothetical protein
13715669	93.9849	0	7.5544	8.17e-25	3.81e-25	B739_1132	hypothetical protein
13715670	57.2195	0	6.8384	1.34e-16	4.54e-17	B739_1133	hypothetical protein
13715671	39.3546	0	6.2985	3.15e-12	8.64e-13	B739_1134	sugar transferase
13715672	58.9024	0	6.8803	5.38e-17	1.84e-17	B739_1135	Acetyltransferase (isoleucine patch superfamily)
13715678	411.54	184.161	1.1601	3.96e-38	2.87e-38	B739_1141	2-methylthioadenine synthetase
13715679	272.893	13.0765	4.3833	1.03e-74	1.67e-74	B739_1142	Dihydrofolate reductase
13715684	56.4427	7.16096	2.9786	6.11e-14	1.82e-14	B739_1147	hypothetical protein
13715685	210.625	69.7415	1.5946	9.02e-28	4.73e-28	B739_1148	hypothetical protein
13715686	289.722	61.3352	2.2399	1.09e-51	1.14e-51	B739_1149	Zn-dependent protease
13715714	134.116	34.8708	1.9434	6.24e-22	2.66e-22	B739_1177	hypothetical protein
13715717	70.0356	0	7.13	1.46e-19	5.62e-20	B739_1180	Adenine-specific DNA methylase
13715718	38.8367	0	6.2793	4.27e-12	1.16e-12	B739_1181	hypothetical protein
13715719	67.0581	0	7.0673	6.94e-19	2.61e-19	B739_1182	DNA modification methylase
13715723	2809.58	303.251	3.2118	0	0	B739_1186	hypothetical protein
13715731	266.808	119.09	1.1638	2.19e-25	1.05e-25	B739_1194	cell wall biogenesis glycosyltransferase
13715735	124.019	12.1425	3.3524	5.48e-31	3.18e-31	B739_1198	hypothetical protein
13715741	34.1763	0	6.0949	6.79e-11	1.72e-11	B739_1204	Thiol-disulfide isomerase and thioredoxin
13715742	317.943	102.9	1.6275	6.75e-42	5.64e-42	B739_1205	hypothetical protein
13715744	701.003	11.9868	5.8699	2.01e-193	1.03e-192	B739_1207	hypothetical protein
13715745	541.514	48.8813	3.4696	6.44e-132	2.05e-131	B739_1208	hypothetical protein
13715756	426.298	56.9763	2.9034	7.84e-93	1.63e-92	B739_1219	hypothetical protein
13715760	136.835	24.752	2.4668	2.06e-27	1.06e-27	B739_1223	hypothetical protein
13715762	183.568	73.4777	1.3209	2.5e-20	9.86e-21	B739_1225	hypothetical protein
13715766	22.6548	9.96307	1.1852	0.0021887	0.00032512	B739_1229	hypothetical protein
13715774	694.919	155.05	2.1641	1.13e-117	3.27e-117	B739_1237	long-chain acyl-CoA synthetase
13715775	317.814	35.0264	3.1817	3.38e-74	5.42e-74	B739_1238	hypothetical protein
13715776	217.097	0	9.4456	3.82e-44	3.37e-44	B739_1239	hypothetical protein
13715785	691.812	240.982	1.5215	3.51e-83	6.46e-83	B739_1248	Delta-aminolevulinic acid dehydratase
13715794	34.0469	0	6.0895	7.34e-11	1.86e-11	B739_1257	hypothetical protein
13715797	101.364	0	7.6634	2.27e-26	1.14e-26	B739_1260	hypothetical protein
13715799	14.2401	0	4.8319	2.38e-05	4.19e-06	B739_1262	hypothetical protein
13715803	209.977	0	8.7141	4.87e-47	4.57e-47	B739_1266	hypothetical protein
13715804	14.499	0	4.8579	1.99e-05	3.53e-06	B739_1267	hypothetical protein
13715805	6.99061	0	3.8054	0.0044288	0.00063737	B739_1268	hypothetical protein
13715807	10.8743	0	4.4428	0.00025434	4.13e-05	B739_1270	hypothetical protein
13715808	29.257	6.38259	2.1966	1.9e-06	3.64e-07	B739_1271	hypothetical protein
13715811	8.80299	0	4.138	0.0011457	0.00017419	B739_1274	hypothetical protein
13715813	5.82551	0	3.5424	0.010779	0.0014879	B739_1276	hypothetical protein
13715814	11.651	0	4.5424	0.00014606	2.42e-05	B739_1277	hypothetical protein
13715815	99.1631	0	7.6317	6.58e-26	3.21e-26	B739_1278	hypothetical protein
13715816	6.34333	0	3.6652	0.0072438	0.0010148	B739_1279	hypothetical protein
13715819	8.02626	0	4.0047	0.0020363	0.00030347	B739_1282	hypothetical protein
13715821	30.681	0	5.9393	5.65e-10	1.37e-10	B739_1284	hypothetical protein
13715822	163.632	0	8.3543	1.22e-38	9.11e-39	B739_1285	hypothetical protein
13715823	36.1182	0	6.1747	2.13e-11	5.55e-12	B739_1286	hypothetical protein
13715824	10.6154	0	4.4081	0.00030634	4.94e-05	B739_1287	hypothetical protein
13715825	12.1688	0	4.6051	0.00010118	1.7e-05	B739_1288	hypothetical protein
13715827	10.3565	0	4.3725	0.00036919	5.9e-05	B739_1290	hypothetical protein
13715828	14.3696	0	4.8449	2.17e-05	3.86e-06	B739_1291	hypothetical protein
13715829	103.435	0	7.6926	8.41e-27	4.27e-27	B739_1292	hypothetical protein
13715830	15.0169	0	4.9085	1.39e-05	2.5e-06	B739_1293	hypothetical protein
13715831	158.972	0	8.3126	9.1e-38	6.5e-38	B739_1294	hypothetical protein
13715832	58.7729	0	6.8771	5.77e-17	1.97e-17	B739_1295	hypothetical protein
13715833	26.6679	0	5.737	6.79e-09	1.54e-09	B739_1296	hypothetical protein
13715835	22.0075	0	5.4599	1.32e-07	2.76e-08	B739_1298	hypothetical protein
13715836	99.1631	0	7.6317	6.58e-26	3.21e-26	B739_1299	hypothetical protein
13715837	100.717	0	7.6542	3.11e-26	1.54e-26	B739_1300	hypothetical protein
13715839	99.422	0	7.6355	5.8e-26	2.86e-26	B739_1302	hypothetical protein
13715841	19.9362	0	5.3173	5.12e-07	1.02e-07	B739_1304	hypothetical protein
13715842	55.7954	0	6.8021	2.92e-16	9.64e-17	B739_1305	hypothetical protein
13715843	10.4859	0	4.3904	0.00033628	5.4e-05	B739_1306	hypothetical protein
13715844	38.9662	0	6.2842	3.96e-12	1.08e-12	B739_1307	hypothetical protein
13715845	22.0075	0	5.4599	1.32e-07	2.76e-08	B739_1308	hypothetical protein
13715847	9.32082	0	4.2205	0.00078348	0.00012165	B739_1310	hypothetical protein
13715848	242.859	0	8.924	1.02e-52	1.08e-52	B739_1311	hypothetical protein
13715849	395.746	0	9.6284	5.95e-77	9.9e-77	B739_1312	hypothetical protein
13715850	96.574	0	7.5936	2.31e-25	1.1e-25	B739_1313	hypothetical protein
13715851	119.358	0	7.8992	4.63e-30	2.62e-30	B739_1314	hypothetical protein
13715852	54.3714	0	6.7648	6.37e-16	2.07e-16	B739_1315	Integrase
13715853	38.4484	4.82586	2.9941	5.42e-10	1.32e-10	-//-
13715854	674.335	9.8074	6.1035	1.13e-184	5.56e-184	B739_1317	hypothetical protein
13715857	173.73	69.5858	1.32	2.61e-19	9.95e-20	B739_1320	HD superfamily phosphohydrolase
13715866	179.685	55.1082	1.7051	1.63e-25	7.82e-26	B739_1329	thymidylate synthase
13715867	124.278	59.6228	1.0596	1.39e-11	3.65e-12	B739_1330	hypothetical protein
13715868	62.2682	0	6.6438	3.83e-18	1.39e-18	B739_1331	hypothetical protein
13715870	103.306	0	7.6908	8.95e-27	4.52e-27	B739_1333	hypothetical protein
13715871	1483.43	0	11.535	1.85e-207	1.02e-206	B739_1334	hypothetical protein
13715872	20.3246	0	5.3452	3.96e-07	7.96e-08	B739_1335	hypothetical protein
13715873	53.0769	0	6.73	1.3e-15	4.15e-16	B739_1336	hypothetical protein
13715878	71.4596	12.1425	2.5571	1.75e-15	5.56e-16	B739_1341	hypothetical protein
13715883	22.3958	2.80211	2.9986	2.14e-06	4.1e-07	B739_1346	recombinase A
13715885	152.499	73.6333	1.0504	9.17e-14	2.72e-14	B739_1348	hypothetical protein
13715890	81.6866	39.3853	1.0524	4.76e-08	1.03e-08	B739_1353	hypothetical protein
13715894	38.7073	0	6.2745	4.61e-12	1.25e-12	B739_1357	hypothetical protein
13715895	67.8348	18.2137	1.897	1.33e-11	3.51e-12	B739_1358	hypothetical protein
13715900	23.4315	1.40106	4.0639	1.24e-07	2.61e-08	B739_1363	hypothetical protein
13715901	51.2645	21.9499	1.2237	2.76e-06	5.23e-07	B739_1364	hypothetical protein
13715903	12.6867	2.80211	2.1787	0.001777	0.00026588	B739_1366	hypothetical protein
13715904	18.3827	6.07125	1.5983	0.0012361	0.00018756	B739_1367	hypothetical protein
13715906	26.9268	0	5.751	5.78e-09	1.32e-09	B739_1369	hypothetical protein
13715908	8.02626	2.3351	1.7812	0.024101	0.0032132	B739_1371	hypothetical protein
13715909	60.7148	0	6.924	2.03e-17	7.03e-18	B739_1372	hypothetical protein
13715910	462.157	1.08971	8.7283	3.86e-101	9.29e-101	B739_1373	hypothetical protein
13715911	377.752	83.1294	2.184	2.33e-65	3.1e-65	B739_1374	hypothetical protein
13715915	39.6135	4.98154	2.9913	3.02e-10	7.42e-11	B739_1378	hypothetical protein
13715916	230.82	33.9367	2.7658	2.54e-49	2.54e-49	B739_1379	hypothetical protein
13715919	21.4897	5.29288	2.0215	8.61e-05	1.45e-05	B739_1382	hypothetical protein
13715920	31.3283	7.78365	2.0089	2.28e-06	4.33e-07	B739_1383	hypothetical protein
13715922	328.17	0	9.3583	1.3e-66	1.79e-66	B739_1385	hypothetical protein
13715923	6.21388	0	3.6355	0.007998	0.0011176	-//-
13715924	83.8873	0	8.0738	3.09e-21	1.27e-21	B739_1387	hypothetical protein
13715925	4137.8	1168.17	1.8246	0	0	B739_1388	hypothetical protein
13715928	615.174	284.259	1.1138	8.05e-54	8.68e-54	B739_1391	transcription elongation factor
13715929	28.6097	0	4.9369	1.98e-09	4.65e-10	B739_1392	hypothetical protein
13715933	1144.39	0	11.16	2.4e-171	1.05e-170	B739_1396	Outer membrane protein-related peptidoglycan-associated (lipo)protein
13715934	1863.77	0	11.864	3.86e-245	2.91e-244	B739_1397	Outer membrane protein-related peptidoglycan-associated (lipo)protein
13715935	518.988	230.24	1.1726	3.7e-48	3.58e-48	B739_1398	Zn-dependent oligopeptidase
13715937	140.589	2.17942	6.0114	4.19e-40	3.33e-40	B739_1400	Small-conductance mechanosensitive channel
13715941	13.3339	2.49077	2.4204	0.00078399	0.00012165	B739_1404	hypothetical protein
13715943	155.994	49.6597	1.6513	1.07e-21	4.47e-22	B739_1406	hypothetical protein
13715944	310.953	4.67019	6.0571	2.27e-86	4.31e-86	B739_1407	hypothetical protein
13715945	171.529	4.98154	5.1057	5e-49	4.92e-49	B739_1408	hypothetical protein
13715946	22.3958	0	5.4852	1.03e-07	2.18e-08	B739_1409	hypothetical protein
13715947	225.641	8.56202	4.7199	3.06e-63	3.96e-63	B739_1410	Negative regulator of beta-lactamase expression
13715952	73.0131	15.5673	2.2296	3.53e-14	1.07e-14	B739_1415	hypothetical protein
13715953	192.371	46.3906	2.052	2.63e-32	1.57e-32	B739_1416	Outer membrane receptor for ferrienterochelin and colicins
13715954	50.4878	14.3219	1.8177	1.1e-08	2.45e-09	B739_1417	hypothetical protein
13715955	512.127	0	10	1.03e-93	2.19e-93	B739_1418	Type I restriction-modification system methyltransferase subunit
13715956	178.908	0	8.4831	1.82e-41	1.49e-41	B739_1419	hypothetical protein
13715957	272.504	0	9.0901	1.14e-57	1.32e-57	B739_1420	hypothetical protein
13715958	19.1595	0	5.26	8.54e-07	1.68e-07	B739_1421	hypothetical protein
13715959	80.2626	0	7.3267	7.59e-22	3.2e-22	B739_1422	hypothetical protein
13715960	25.2439	0	7.3413	7.31e-08	1.55e-08	B739_1423	hypothetical protein
13715972	42.2026	0	6.3993	6.02e-13	1.71e-13	B739_1435	hypothetical protein
13715975	51.6529	14.9446	1.7892	9.77e-09	2.18e-09	B739_1438	hypothetical protein
13715976	109.002	0	7.7682	5.93e-28	3.17e-28	B739_1439	hypothetical protein
13715977	168.163	0	8.3937	1.74e-39	1.36e-39	B739_1440	hypothetical protein
13715978	23.8199	9.49605	1.3268	0.00085119	0.00013171	B739_1441	hypothetical protein
13715979	44.7917	5.7599	2.9591	2.55e-11	6.61e-12	B739_1442	hypothetical protein
13715980	22.5253	0	5.4935	9.47e-08	2.01e-08	B739_1443	hypothetical protein
13715981	11.3921	0	4.51	0.00017563	2.89e-05	B739_1444	hypothetical protein
13715982	5.04878	0	3.3359	0.019703	0.0026519	B739_1445	hypothetical protein
13715984	16.0525	0	5.0047	6.86e-06	1.26e-06	B739_1447	hypothetical protein
13715988	749.678	348.396	1.1055	1.07e-64	1.41e-64	B739_1451	Lipoate synthase
13715997	16.6998	6.69394	1.3189	0.0053672	0.0007637	B739_1463	hypothetical protein
13716000	146.803	0	8.1977	1.87e-35	1.25e-35	B739_1467	hypothetical protein
13716001	8.80299	0	4.138	0.0011457	0.00017419	B739_1468	hypothetical protein
13716002	22.2664	0	5.4768	1.12e-07	2.36e-08	B739_1469	hypothetical protein
13716003	7.76735	0	3.9574	0.0024701	0.000365	B739_1470	hypothetical protein
13716004	111.461	0	7.8004	1.86e-28	1.02e-28	B739_1471	hypothetical protein
13716005	5735.02	0	15.169	0	0	B739_1472	hypothetical protein
13716006	4386.74	0	14.782	0	0	B739_1473	hypothetical protein
13716007	998.233	0	10.963	7.94e-155	2.99e-154	B739_1474	hypothetical protein
13716008	273.67	0	9.0963	7.32e-58	8.54e-58	B739_1475	hypothetical protein
13716013	190.818	48.8813	1.9648	8.03e-31	4.63e-31	B739_1481	hypothetical protein
13716014	81.6866	0	7.352	3.69e-22	1.58e-22	B739_1482	hypothetical protein
13716021	33.0112	2.80211	3.5584	1.22e-09	2.92e-10	B739_1489	effector of murein hydrolase
13716023	841.074	17.9024	5.554	3.89e-233	2.67e-232	B739_1491	hypothetical protein
13716024	1848.37	0	12.535	1.53e-214	9.33e-214	B739_1492	hypothetical protein
13716025	135.022	55.7309	1.2766	7.19e-15	2.25e-15	B739_1493	antimicrobial peptide ABC transporter ATPase
13716026	79.3564	6.22692	3.6718	2.04e-21	8.47e-22	B739_1494	DNA repair protein
13716027	52.1707	6.53827	2.9963	4.78e-13	1.37e-13	B739_1495	hypothetical protein
13716035	38.1895	6.53827	2.5462	6.34e-09	1.44e-09	B739_1503	hypothetical protein
13716040	80.0037	19.6148	2.0281	3.24e-14	9.78e-15	B739_1508	hypothetical protein
13716041	153.535	6.69394	4.5196	3.5e-43	3.04e-43	B739_1509	hypothetical protein
13716042	22.0075	0	5.4599	1.32e-07	2.76e-08	B739_1510	hypothetical protein
13716043	44.015	0	6.4599	2.12e-13	6.19e-14	B739_1511	hypothetical protein
13716049	268.362	115.509	1.2162	1.13e-26	5.66e-27	B739_1518	Zn-ribbon-containing protein involved in phosphonate metabolism
13716060	95.9267	39.5409	1.2786	5.25e-11	1.34e-11	B739_1529	hypothetical protein
13716061	11.1332	0	4.4768	0.00021129	3.45e-05	B739_1530	hypothetical protein
13716073	198.456	41.7204	2.25	4.28e-36	2.92e-36	B739_1542	hypothetical protein
13716087	39.2251	0	6.2937	3.4e-12	9.3e-13	B739_1556	hypothetical protein
13716088	77.2851	0	7.2721	3.45e-21	1.41e-21	B739_1557	hypothetical protein
13716089	69.2588	0	7.1139	2.19e-19	8.39e-20	B739_1558	hypothetical protein
13716091	736.344	359.293	1.0352	2.13e-59	2.55e-59	B739_1560	S-adenosylmethionine:tRNA-ribosyltransferase-isomerase (queuine synthetase)
13716097	10.6154	0	4.4081	0.00030634	4.94e-05	B739_1566	hypothetical protein
13716099	88.0299	18.2137	2.273	4.75e-17	1.63e-17	B739_1568	aspartate carbamoyltransferase catalytic subunit
13716107	167.257	69.4302	1.2684	6.1e-18	2.18e-18	B739_1576	Ferredoxin
13716108	41.1669	9.02903	2.1888	1.68e-08	3.72e-09	B739_1577	hypothetical protein
13716110	51.0056	14.4776	1.8168	9.33e-09	2.09e-09	B739_1579	hypothetical protein
13716111	1057.14	429.813	1.2984	5e-107	1.26e-106	B739_1580	Glutamyl- and glutaminyl-tRNA synthetase
13716112	176.966	0	8.4673	4.12e-41	3.34e-41	B739_1581	Hydroxymethylpyrimidine/phosphomethylpyrimidine kinase
13716113	66.1519	0	7.0477	1.12e-18	4.16e-19	B739_1582	molybdopterin and thiamine biosynthesis family protein
13716114	62.1388	0	6.9574	9.44e-18	3.32e-18	B739_1583	thiamine biosynthesis enzyme ThiH-related protein
13716115	39.0956	0	6.2889	3.67e-12	1e-12	B739_1584	enzyme of thiazole biosynthesis
13716116	42.332	0	6.4037	5.59e-13	1.58e-13	B739_1585	hypothetical protein
13716117	7.24952	0	3.8579	0.0036427	0.00052997	B739_1586	hypothetical protein
13716118	25.1144	0	5.6504	1.81e-08	3.98e-09	B739_1587	hypothetical protein
13716119	164.668	0	8.3634	7.78e-39	5.85e-39	B739_1588	Thiamine biosynthesis protein ThiC
13716120	16.0525	0	5.0047	6.86e-06	1.26e-06	B739_1589	hypothetical protein
13716121	107.06	43.4328	1.3016	2.56e-12	7.03e-13	B739_1590	hypothetical protein
13716122	166.998	30.3562	2.4598	5.2e-33	3.19e-33	B739_1591	hypothetical protein
13716128	53.7241	11.6755	2.2021	1.03e-10	2.59e-11	B739_1597	hypothetical protein
13716129	19.1595	7.00529	1.4515	0.001708	0.00025641	-//-
13716149	229.655	0	8.8433	1.84e-50	1.88e-50	B739_1618	hypothetical protein
13716150	100.976	0	7.6579	2.74e-26	1.36e-26	B739_1619	hypothetical protein
13716154	83.8873	7.62798	3.4591	7.25e-22	3.07e-22	B739_1623	Kef-type K+ transport system NAD-binding protein
13716155	437.69	215.607	1.0215	1.57e-35	1.05e-35	B739_1624	peptide chain release factor RF-3
13716156	494.392	124.694	1.9873	6.81e-78	1.15e-77	B739_1625	hypothetical protein
13716159	123.371	0	7.9469	7.24e-31	4.18e-31	B739_1628	hypothetical protein
13716163	16.0525	6.22692	1.3662	0.0054184	0.00076952	B739_1632	hypothetical protein
13716166	80.5215	1.86808	5.4297	6e-24	2.73e-24	-//-
13716167	108.743	0	7.7648	6.7e-28	3.55e-28	B739_1636	hypothetical protein
13716168	81.8161	0	7.3543	3.46e-22	1.49e-22	B739_1637	hypothetical protein
13716170	137.223	0	8.1004	1.33e-33	8.37e-34	B739_1639	hypothetical protein
13716171	24.985	0	5.643	1.96e-08	4.31e-09	B739_1640	hypothetical protein
13716172	15.2758	0	4.9332	1.17e-05	2.1e-06	B739_1641	hypothetical protein
13716173	5.17823	0	3.3725	0.017808	0.0024039	B739_1642	hypothetical protein
13716174	73.1425	0	7.1926	2.9e-20	1.14e-20	B739_1643	hypothetical protein
13716175	16.8293	0	5.0729	4.06e-06	7.58e-07	B739_1644	hypothetical protein
13716176	19.5478	0	5.2889	6.61e-07	1.31e-07	B739_1645	hypothetical protein
13716177	12.0394	0	4.5897	0.00011089	1.85e-05	B739_1646	hypothetical protein
13716178	56.4427	0	6.8187	2.05e-16	6.84e-17	B739_1647	hypothetical protein
13716179	80.1331	0	7.3243	8.1e-22	3.41e-22	B739_1648	hypothetical protein
13716180	182.662	0	8.513	3.75e-42	3.17e-42	B739_1649	periplasmic or secreted lipoprotein
13716181	15.4052	0	4.9453	1.07e-05	1.93e-06	B739_1650	hypothetical protein
13716182	27.7035	0	5.792	3.56e-09	8.25e-10	B739_1651	hypothetical protein
13716184	9.45027	0	4.2404	0.00071276	0.00011097	B739_1653	hypothetical protein
13716186	9.70918	0	4.2793	0.00059018	9.28e-05	B739_1656	hypothetical protein
13716187	45.1801	0	6.4976	1.09e-13	3.22e-14	B739_1657	hypothetical protein
13716188	11.1332	0	4.4768	0.00021129	3.45e-05	B739_1658	hypothetical protein
13716189	21.2307	0	5.4081	2.19e-07	4.48e-08	B739_1659	hypothetical protein
13716190	63.8217	0	6.996	3.85e-18	1.39e-18	B739_1660	hypothetical protein
13716191	15.5347	0	4.9574	9.77e-06	1.77e-06	B739_1661	hypothetical protein
13716192	89.0656	0	7.4768	9.22e-24	4.16e-24	B739_1662	hypothetical protein
13716193	19.03	0	5.2502	9.31e-07	1.83e-07	B739_1663	hypothetical protein
13716194	49.0637	0	6.6166	1.21e-14	3.75e-15	B739_1664	DNA modification methylase
13716195	13.075	0	4.7087	5.35e-05	9.16e-06	B739_1665	hypothetical protein
13716196	5.43714	0	3.4428	0.014558	0.0019841	B739_1666	hypothetical protein
13716197	12.2983	0	4.6204	9.23e-05	1.56e-05	B739_1667	hypothetical protein
13716198	27.4446	0	5.7785	4.18e-09	9.65e-10	B739_1668	hypothetical protein
13716199	18.2533	0	5.1901	1.56e-06	3.01e-07	B739_1669	hypothetical protein
13716200	20.9718	0	5.3904	2.6e-07	5.26e-08	B739_1670	hypothetical protein
13716201	36.5065	0	6.1901	1.69e-11	4.42e-12	B739_1671	hypothetical protein
13716203	11.0037	0	4.4599	0.0002318	3.77e-05	B739_1673	hypothetical protein
13716204	16.6998	0	5.0618	4.43e-06	8.25e-07	B739_1674	hypothetical protein
13716206	5.04878	0	3.3359	0.019703	0.0026519	B739_1676	hypothetical protein
13716208	9.19136	0	4.2003	0.00086136	0.0001331	B739_1678	hypothetical protein
13716209	117.675	0	7.8787	1.01e-29	5.68e-30	B739_1679	hypothetical protein
13716210	89.9718	0	7.4914	5.89e-24	2.68e-24	B739_1680	hypothetical protein
13716211	9.57973	0	4.26	0.00064853	0.00010146	B739_1681	hypothetical protein
13716212	96.4446	0	7.5916	2.46e-25	1.17e-25	B739_1682	hypothetical protein
13716215	502.547	183.227	1.4556	2.94e-58	3.47e-58	B739_1685	hypothetical protein
13716216	371.279	0	9.5364	2.88e-73	4.43e-73	B739_1686	hypothetical protein
13716217	67.4465	0	7.0757	5.66e-19	2.13e-19	B739_1687	hypothetical protein
13716225	62.7861	20.7045	1.6005	2.31e-09	5.42e-10	B739_1695	hypothetical protein
13716231	50.3583	20.8602	1.2715	2.12e-06	4.06e-07	B739_1701	hypothetical protein
13716233	71.9774	3.58048	4.3293	7.01e-21	2.85e-21	B739_1703	hypothetical protein
13716247	1706.1	658.185	1.3741	4.59e-182	2.21e-181	B739_1724	preprotein translocase subunit SecD
13716248	216.838	67.0951	1.6923	3.13e-30	1.78e-30	B739_1725	prephenate dehydratase
13716249	395.487	183.227	1.11	4.25e-35	2.8e-35	B739_1726	Methionine aminopeptidase
13716254	55.7954	19.3035	1.5313	3.7e-08	8.03e-09	B739_1731	arsenate reductase-like protein
13716257	90.878	44.3668	1.0344	1.16e-08	2.57e-09	B739_1734	hypothetical protein
13716259	109.261	0	7.7716	5.25e-28	2.81e-28	B739_1736	hypothetical protein
13716260	93.8554	30.6676	1.6137	2.21e-13	6.43e-14	B739_1737	hypothetical protein
13716266	78.1913	29.8892	1.3874	6.09e-10	1.48e-10	B739_1743	hypothetical protein
13716267	176.578	86.7099	1.026	2.38e-15	7.55e-16	B739_1744	membrane protein TerC
13716276	24.4671	0	5.6128	2.73e-08	5.95e-09	B739_1753	hypothetical protein
13716280	31.5872	10.8971	1.5354	3.36e-05	5.85e-06	B739_1757	ssDNA-binding protein
13716282	38.5778	3.73615	3.3681	1.01e-10	2.55e-11	B739_1759	hypothetical protein
13716290	33.788	15.8786	1.0894	0.00034799	5.58e-05	B739_1767	hypothetical protein
13716291	7.76735	1.86808	2.0559	0.017322	0.0023453	B739_1768	hypothetical protein
13716292	326.876	112.863	1.5342	1.4e-40	1.13e-40	B739_1769	Acyl-coenzyme A synthetase/AMP-(fatty) acid ligase
13716297	323.639	96.0502	1.7525	8.25e-46	7.57e-46	B739_1774	hypothetical protein
13716298	55.666	0	6.7987	3.13e-16	1.03e-16	B739_1775	hypothetical protein
13716309	103.047	0	7.6872	1.01e-26	5.11e-27	B739_1786	hypothetical protein
13716310	118.193	10.2744	3.524	1.9e-30	1.09e-30	B739_1787	hypothetical protein
13716311	316.131	0	9.3044	1.03e-64	1.36e-64	B739_1788	hypothetical protein
13716312	140.589	17.4354	3.0114	1.29e-32	7.83e-33	B739_1789	Lipoate-protein ligase B
13716313	202.857	25.219	3.0079	2.93e-46	2.7e-46	B739_1790	hypothetical protein
13716315	171.529	0	8.4223	4.13e-40	3.3e-40	B739_1792	hypothetical protein
13716316	44.6622	0	6.481	1.47e-13	4.3e-14	B739_1793	hypothetical protein
13716317	37.8011	0	6.2404	7.85e-12	2.1e-12	B739_1794	hypothetical protein
13716318	122.983	0	7.9423	8.66e-31	4.98e-31	B739_1795	membrane-bound metal-dependent hydrolase
13716319	103.694	0	7.6962	7.43e-27	3.79e-27	B739_1796	hypothetical protein
13716320	13.4634	0	4.751	4.08e-05	7.05e-06	B739_1797	hypothetical protein
13716321	14.8874	0	4.896	1.52e-05	2.73e-06	B739_1798	hypothetical protein
13716322	68.2232	0	8.7756	2.88e-16	9.54e-17	B739_1799	hypothetical protein
13716323	8.80299	0	4.138	0.0011457	0.00017419	B739_1800	hypothetical protein
13716328	172.953	0	8.4342	2.26e-40	1.81e-40	B739_1805	hypothetical protein
13716329	629.543	0	11.982	2.34e-82	4.2e-82	B739_1806	hypothetical protein
13716335	33.9174	9.18471	1.8847	1.86e-06	3.57e-07	B739_1812	hypothetical protein
13716339	11.9099	0	4.5741	0.00012154	2.02e-05	B739_1816	hypothetical protein
13716340	5.17823	0	3.3725	0.017808	0.0024039	B739_1817	hypothetical protein
13716341	17.0882	0	5.0949	3.41e-06	6.41e-07	B739_1818	hypothetical protein
13716342	20.1951	0	5.3359	4.32e-07	8.61e-08	B739_1819	hypothetical protein
13716344	156.512	73.1663	1.097	1.1e-14	3.42e-15	B739_1821	hypothetical protein
13716347	44.6622	0	6.481	1.47e-13	4.3e-14	B739_1824	hypothetical protein
13716357	320.921	67.2507	2.2546	2.17e-57	2.47e-57	B739_1834	cytochrome c peroxidase
13716359	28.9981	9.65173	1.5871	5.29e-05	9.06e-06	B739_1836	protocatechuate 3,4-dioxygenase subunit beta
13716363	196.126	95.7389	1.0346	5.13e-17	1.76e-17	B739_1840	Phosphoribosylaminoimidazolesuccinocarboxamide (SAICAR) synthase
13716366	260.465	18.5251	3.8135	1.15e-67	1.62e-67	B739_1843	3-hydroxyacyl-CoA dehydrogenase
13716384	211.531	41.2533	2.3583	6.23e-40	4.91e-40	B739_1861	Na+/H+ antiporter
13716390	351.602	123.76	1.5064	9.86e-43	8.48e-43	B739_1867	hypothetical protein
13716395	57.3489	4.51452	3.6671	6.71e-16	2.17e-16	B739_1872	hypothetical protein
13716400	114.18	24.285	2.2332	2.49e-21	1.02e-21	B739_1877	phosphate starvation-inducible protein PhoH
13716409	410.504	145.399	1.4974	2.67e-49	2.66e-49	B739_1886	subtilisin-like serine protease
13716415	32.105	0	6.0047	2.37e-10	5.85e-11	B739_1893	hypothetical protein
13716424	66.2814	0	8.7339	6.34e-16	2.06e-16	B739_1902	lipoprotein NlpE
13716434	172.694	69.1188	1.3211	3.21e-19	1.22e-19	B739_1912	hypothetical protein
13716437	486.236	159.565	1.6075	2.33e-62	2.96e-62	B739_1915	hypothetical protein
13716447	150.428	17.2797	3.1219	1.28e-35	8.59e-36	B739_1926	hypothetical protein
13716448	177.743	28.6438	2.6335	5.6e-37	3.9e-37	B739_1927	hypothetical protein
13716450	698.932	184.628	1.9205	7.7e-106	1.92e-105	B739_1929	Phosphoribosylamine-glycine ligase
13716451	111.85	29.5779	1.919	2.41e-18	8.89e-19	B739_1930	hypothetical protein
13716453	158.066	25.3747	2.6391	3.98e-33	2.45e-33	B739_1932	hypothetical protein
13716454	254.51	122.515	1.0548	4.95e-22	2.11e-22	B739_1933	hypothetical protein
13716455	327.394	116.599	1.4895	1.84e-39	1.43e-39	B739_1934	Tetrahydrodipicolinate N-succinyltransferase
13716456	131.398	4.0475	5.0208	6.56e-38	4.7e-38	B739_1935	cell wall-associated hydrolase
13716457	4363.57	0	13.091	0	0	B739_1936	hypothetical protein
13716458	1767.46	0	11.787	7.75e-236	5.48e-235	B739_1937	hypothetical protein
13716459	2529.31	0	12.305	6.9e-306	7.1e-305	B739_1938	hypothetical protein
13716468	138.518	57.599	1.266	4.29e-15	1.35e-15	B739_1947	hypothetical protein
13716469	164.409	17.5911	3.2244	1.41e-39	1.1e-39	B739_1948	hypothetical protein
13716470	529.086	15.1003	5.1309	2.25e-147	8.36e-147	B739_1949	ATPase
13716479	41.4258	0	6.3725	9.43e-13	2.63e-13	B739_1958	hypothetical protein
13716480	8.93245	0	4.1591	0.0010416	0.00015911	B739_1959	hypothetical protein
13716482	26.7973	0	5.744	6.26e-09	1.43e-09	B739_1961	hypothetical protein
13716483	88.1594	0	7.462	1.44e-23	6.48e-24	B739_1962	hypothetical protein
13716484	18.7711	0	5.2304	1.11e-06	2.15e-07	B739_1963	hypothetical protein
13716485	284.026	0	9.1499	1.48e-59	1.78e-59	B739_1964	hypothetical protein
13716487	12.4278	0	4.6355	8.43e-05	1.43e-05	B739_1966	hypothetical protein
13716488	24.4671	0	5.6128	2.73e-08	5.95e-09	B739_1967	hypothetical protein
13716489	28.0919	0	5.8121	2.79e-09	6.53e-10	B739_1968	hypothetical protein
13716490	12.2983	0	4.6204	9.23e-05	1.56e-05	B739_1969	hypothetical protein
13716491	7.37898	0	3.8834	0.0033046	0.00048358	B739_1970	hypothetical protein
13716492	16.3114	0	5.0278	5.76e-06	1.06e-06	B739_1971	Negative regulator of beta-lactamase expression
13716493	44.2739	0	6.4684	1.83e-13	5.35e-14	B739_1972	hypothetical protein
13716494	42.4615	0	6.4081	5.18e-13	1.47e-13	B739_1973	hypothetical protein
13716495	7.12007	0	3.8319	0.0040162	0.00058132	B739_1974	hypothetical protein
13716496	13.2045	0	4.723	4.89e-05	8.41e-06	B739_1975	hypothetical protein
13716497	60.8442	0	6.927	1.89e-17	6.57e-18	B739_1976	hypothetical protein
13716498	15.7936	0	4.9813	8.19e-06	1.49e-06	B739_1977	hypothetical protein
13716499	93.9849	0	7.5544	8.17e-25	3.81e-25	B739_1978	hypothetical protein
13716500	46.0863	0	6.5263	6.51e-14	1.94e-14	B739_1979	hypothetical protein
13716501	16.6998	0	5.0618	4.43e-06	8.25e-07	B739_1980	hypothetical protein
13716502	20.454	0	5.3543	3.64e-07	7.33e-08	B739_1981	hypothetical protein
13716503	37.1538	0	6.2154	1.15e-11	3.05e-12	B739_1982	hypothetical protein
13716505	20.1951	0	5.3359	4.32e-07	8.61e-08	B739_1984	hypothetical protein
13716507	9.45027	0	4.2404	0.00071276	0.00011097	B739_1986	hypothetical protein
13716510	21.1013	0	5.3993	2.39e-07	4.85e-08	B739_1989	hypothetical protein
13716511	16.9587	0	5.084	3.72e-06	6.96e-07	B739_1990	hypothetical protein
13716515	37.8011	0	6.2404	7.85e-12	2.1e-12	B739_1994	hypothetical protein
13716516	32.2345	0	6.0105	2.19e-10	5.41e-11	B739_1995	hypothetical protein
13716517	114.957	0	7.8449	3.6e-29	2e-29	B739_1996	hypothetical protein
13716519	10.4859	0	4.3904	0.00033628	5.4e-05	B739_1998	hypothetical protein
13716520	27.5741	0	5.7852	3.85e-09	8.91e-10	B739_1999	prophage antirepressor
13716522	60.5853	0	6.9209	2.17e-17	7.52e-18	B739_2001	hypothetical protein
13716525	15.7936	0	6.6647	1.24e-05	2.24e-06	B739_2004	hypothetical protein
13716526	10.6154	0	4.4081	0.00030634	4.94e-05	B739_2005	hypothetical protein
13716527	235.739	0	8.881	1.67e-51	1.74e-51	B739_2006	Superfamily II DNA/RNA helicase, SNF2 family
13716528	426.557	0	9.7366	1.66e-81	2.91e-81	B739_2007	restriction endonuclease
13716529	481.446	0	9.9112	2.09e-89	4.14e-89	B739_2008	Adenine specific DNA methylase Mod
13716530	277.294	106.792	1.3766	3.84e-31	2.23e-31	B739_2009	GTPase
13716532	13.9812	0	4.8054	2.85e-05	4.98e-06	B739_2011	hypothetical protein
13716533	16.5703	0	5.0505	4.83e-06	8.94e-07	B739_2012	hypothetical protein
13716535	8.80299	0	4.138	0.0011457	0.00017419	B739_2014	hypothetical protein
13716536	35.9887	0	6.1695	2.3e-11	5.98e-12	B739_2015	hypothetical protein
13716540	72.2363	35.1821	1.0379	3.46e-07	6.99e-08	B739_2019	hypothetical protein
13716543	54.8892	0	6.7785	4.79e-16	1.57e-16	B739_2022	hypothetical protein
13716547	129.974	58.8444	1.1432	6.11e-13	1.73e-13	B739_2026	hypothetical protein
13716552	1640.08	361.628	2.1812	4.85e-277	4.57e-276	B739_2031	hypothetical protein
13716563	388.756	96.9843	2.003	4.24e-62	5.36e-62	B739_2042	hypothetical protein
13716564	936.742	167.971	2.4794	5.3e-178	2.5e-177	B739_2043	Outer membrane protein-related peptidoglycan-associated (lipo)protein
13716569	414.517	148.823	1.4778	4.14e-49	4.09e-49	B739_2048	GTPase
13716572	113.274	15.1003	2.9072	5.7e-26	2.81e-26	B739_2051	hypothetical protein
13716576	93.3376	41.7204	1.1617	7.64e-10	1.84e-10	B739_2055	hypothetical protein
13716577	206.353	33.9367	2.6042	2.79e-42	2.37e-42	B739_2056	hypothetical protein
13716578	121.3	23.5066	2.3674	1.1e-23	4.94e-24	B739_2057	hypothetical protein
13716579	227.583	66.628	1.7722	4.5e-33	2.77e-33	B739_2058	hypothetical protein
13716580	13.075	5.7599	1.1827	0.020091	0.0027024	B739_2059	hypothetical protein
13716584	12.6867	0	4.6652	7.02e-05	1.2e-05	B739_2063	hypothetical protein
13716598	155.217	14.3219	3.438	6.45e-39	4.87e-39	B739_2077	hypothetical protein
13716600	135.281	47.0132	1.5248	1.2e-17	4.21e-18	B739_2079	hypothetical protein
13716603	737.121	0	12.209	3.47e-92	7.15e-92	B739_2082	hypothetical protein
13716604	1499.87	0	11.551	3.82e-209	2.22e-208	B739_2083	hypothetical protein
13716605	6.7317	0	3.751	0.0053888	0.0007658	B739_2084	hypothetical protein
13716607	7.50844	0	4.007	0.0028444	0.00041814	B739_2086	hypothetical protein
13716620	64.5984	8.56202	2.9155	1.62e-15	5.17e-16	B739_2099	hypothetical protein
13716621	31.8461	0	5.993	2.78e-10	6.84e-11	B739_2100	hypothetical protein
13716625	50.2288	1.86808	4.7489	2.29e-15	7.27e-16	B739_2104	hypothetical protein
13716629	744.112	351.977	1.08	1.08e-62	1.39e-62	B739_2108	hypothetical protein
13716632	65.1163	23.9736	1.4416	8.31e-09	1.87e-09	B739_2111	hypothetical protein
13716634	82.075	18.9921	2.1115	4.72e-15	1.49e-15	B739_2113	protein-tyrosine-phosphatase
13716638	384.225	99.7864	1.945	9.91e-60	1.2e-59	B739_2117	hypothetical protein
13716648	46.4746	0	6.5384	5.22e-14	1.57e-14	B739_2127	hypothetical protein
13716649	86.7354	0	7.4385	2.93e-23	1.31e-23	B739_2128	transcriptional regulator
13716650	70.5534	0	7.1406	1.11e-19	4.32e-20	B739_2129	hypothetical protein
13716651	271.987	0	9.0874	1.39e-57	1.59e-57	B739_2130	hypothetical protein
13716658	44.5328	10.4301	2.0941	9.02e-09	2.02e-09	-//-
13716662	7.50844	0	3.9085	0.0029985	0.00044021	B739_2141	hypothetical protein
13716663	104.082	0	7.7016	6.17e-27	3.16e-27	B739_2142	hypothetical protein
13716664	33.0112	0	7.7283	1.5e-09	3.57e-10	B739_2143	hypothetical protein
13716665	15.6641	0	4.9694	8.94e-06	1.63e-06	B739_2144	hypothetical protein
13716683	64.3395	0	7.0076	2.92e-18	1.07e-18	B739_2162	hypothetical protein
13716684	23.302	0	5.5424	5.75e-08	1.24e-08	B739_2163	hypothetical protein
13716685	25.1144	0	5.6504	1.81e-08	3.98e-09	B739_2164	hypothetical protein
13716686	199.232	0	10.322	8.61e-36	5.82e-36	B739_2165	hypothetical protein
13716687	73.0131	0	7.1901	3.1e-20	1.22e-20	B739_0195	hypothetical protein
13716688	26.409	0	5.723	7.99e-09	1.8e-09	B739_0196	hypothetical protein
13716689	51.135	17.5911	1.5395	1.26e-07	2.64e-08	B739_0197	hypothetical protein
13716692	415.812	158.475	1.3917	2.36e-46	2.19e-46	B739_0200	hypothetical protein
13716697	449.082	213.583	1.0722	3.01e-38	2.2e-38	B739_0206	pyrophosphatase
13716698	15.2758	1.24538	3.6166	3.29e-05	5.73e-06	B739_0207	hypothetical protein
13716701	135.022	34.2481	1.9791	1.97e-22	8.55e-23	B739_0210	hypothetical protein
13716702	29.1275	1.55673	4.2258	2.88e-09	6.71e-10	B739_0211	hypothetical protein
13716712	437.172	19.9261	4.4555	4.23e-119	1.24e-118	B739_0221	hypothetical protein
13716717	87.2532	41.0977	1.0862	9.55e-09	2.14e-09	B739_0226	Panthothenate synthetase
13716721	343.576	151.937	1.1772	1.37e-32	8.23e-33	B739_0230	Phenylalanyl-tRNA synthetase subunit alpha
13716736	61.6209	0	6.9453	1.25e-17	4.36e-18	B739_0245	hypothetical protein
13716737	19.8067	0	5.3079	5.57e-07	1.11e-07	B739_0246	hypothetical protein
13716738	29.7748	0	5.896	9.86e-10	2.36e-10	B739_0247	hypothetical protein
13716739	118.064	34.4037	1.7789	5.37e-18	1.93e-18	B739_0248	hypothetical protein
13716740	56.7016	0	6.8253	1.78e-16	5.97e-17	B739_0249	hypothetical protein
13716741	222.276	86.7099	1.3581	5.92e-25	2.78e-25	B739_0250	hypothetical protein
13716742	299.561	88.5779	1.7578	1.18e-42	1.01e-42	B739_0251	hypothetical protein
13716752	1461.04	394.475	1.889	1.22e-215	7.88e-215	B739_0261	Dipeptide/tripeptide permease
13716754	149.78	0	8.2267	5.04e-36	3.41e-36	B739_0263	hypothetical protein
13716755	413.223	170.773	1.2748	3.83e-42	3.22e-42	B739_0264	NAD-dependent DNA ligase (contains BRCT domain type II)
13716756	50.2288	11.0528	2.1841	4.8e-10	1.17e-10	B739_0265	transcriptional regulator
13716763	9.96809	0	4.3173	0.00048898	7.74e-05	B739_0272	hypothetical protein
13716764	27.3152	0	5.7716	4.53e-09	1.04e-09	B739_0274	hypothetical protein
13716767	117.934	0	7.5652	1.1e-30	6.29e-31	B739_0276	hypothetical protein
13716770	54.8892	3.73615	3.8769	1.15e-15	3.69e-16	B739_0279	hypothetical protein
13716771	35.6003	0	6.1538	2.89e-11	7.46e-12	B739_0280	hypothetical protein
13716789	152.111	60.7125	1.3251	3.65e-17	1.26e-17	B739_0299	hypothetical protein
13716794	48.5459	9.18471	2.402	1.69e-10	4.21e-11	-//-
13716795	138.129	49.504	1.4804	1.74e-17	6.06e-18	B739_0305	membrane protein TerC
13716799	79.8742	0	7.3197	9.24e-22	3.87e-22	B739_0309	hypothetical protein
13716808	776.476	93.8708	3.0482	2.14e-173	9.67e-173	B739_0318	Parvulin-like peptidyl-prolyl isomerase
13716811	11.0037	0	4.4599	0.0002318	3.77e-05	B739_0321	hypothetical protein
13716812	34.4352	1.08971	4.9819	4.52e-11	1.16e-11	B739_0322	hypothetical protein
13716813	184.604	0	8.5283	1.66e-42	1.42e-42	B739_0323	hypothetical protein
13716819	196.255	76.7468	1.3546	3.64e-22	1.57e-22	B739_0329	hypothetical protein
13716822	165.315	0	8.3691	5.89e-39	4.46e-39	B739_0333	hypothetical protein
13716823	18.6416	0	5.2205	1.2e-06	2.34e-07	B739_0334	hypothetical protein
13716824	167.645	0	8.3893	2.17e-39	1.68e-39	B739_0335	hypothetical protein
13716825	135.411	0	8.0812	3.02e-33	1.88e-33	B739_0336	hypothetical protein
13716826	108.484	0	7.7613	7.58e-28	4.01e-28	B739_0337	hypothetical protein
13716827	72.8836	4.0475	4.1705	7.16e-21	2.91e-21	B739_0338	hypothetical protein
13716830	41.4258	1.08971	5.2485	4.55e-13	1.3e-13	B739_0341	hypothetical protein
13716836	3182.15	93.2481	5.0928	0	0	B739_0347	hypothetical protein
13716842	16.9587	0	5.084	3.72e-06	6.96e-07	B739_0353	hypothetical protein
13716843	75.6022	0	7.2404	8.17e-21	3.31e-21	B739_0355	hypothetical protein
13716844	521.318	0	11.709	6.19e-72	9.4e-72	B739_0356	hypothetical protein
13716850	75.4727	0	7.2379	8.74e-21	3.52e-21	B739_0362	hypothetical protein
13716857	126.737	57.599	1.1377	1.35e-12	3.73e-13	B739_0369	hypothetical protein
13716859	28.0919	12.2982	1.1917	0.00062329	9.76e-05	B739_0371	hypothetical protein
13716863	17.7354	0	5.1486	2.2e-06	4.2e-07	B739_0375	hypothetical protein
13716865	510.056	58.066	3.1349	8.84e-117	2.5e-116	B739_0377	hypothetical protein
13716866	610.384	12.2982	5.6332	1.43e-169	6.09e-169	B739_0378	hypothetical protein
13716867	424.097	21.4829	4.3031	2.18e-114	6.03e-114	B739_0379	hypothetical protein
13716868	30.2927	0	5.9209	7.17e-10	1.73e-10	B739_0380	hypothetical protein
13716870	528.309	130.298	2.0196	2.24e-84	4.2e-84	B739_0382	UDP-glucose 6-dehydrogenase
13716873	194.572	0	8.6042	2.65e-44	2.34e-44	B739_0385	metal-sulfur cluster biosynthetic enzyme
13716882	751.75	343.57	1.1296	2.45e-66	3.31e-66	B739_0394	transcription termination factor
13716895	50.6172	18.3694	1.4623	3.08e-07	6.22e-08	B739_0407	hypothetical protein
13716898	43.8855	13.6992	1.6797	3.06e-07	6.18e-08	B739_0410	hypothetical protein
13716903	148.097	59.9341	1.3051	1.65e-16	5.55e-17	B739_0415	Glycosyltransferase
13716904	258.782	100.565	1.3636	6.71e-29	3.7e-29	B739_0416	hypothetical protein
13716909	79.0975	1.08971	6.1816	3.8e-23	1.69e-23	B739_0421	hypothetical protein
13716911	126.608	43.8998	1.5281	1.2e-16	4.06e-17	B739_0423	hypothetical protein
13716912	753.303	297.802	1.3389	2.78e-79	4.77e-79	B739_0424	CTP:phosphocholine cytidylyltransferase involved in choline phosphorylation for cell surface LPS epitopes
13716913	149.91	66.9394	1.1632	6.09e-15	1.91e-15	B739_0425	hypothetical protein
13716914	132.692	0	8.0519	1.03e-32	6.25e-33	B739_0426	hypothetical protein
13716916	108.096	0	7.7562	9.11e-28	4.76e-28	B739_0428	Acetyltransferase (isoleucine patch superfamily)
13716917	97.3507	1.7124	5.8291	1.93e-28	1.05e-28	B739_0429	cell wall biogenesis glycosyltransferase
13716920	113.792	0	7.8303	6.2e-29	3.43e-29	B739_0432	hypothetical protein
13716921	74.0487	0	7.2104	1.82e-20	7.27e-21	B739_0433	hypothetical protein
13716922	146.026	0	8.1901	2.64e-35	1.75e-35	B739_0434	hypothetical protein
13716923	114.827	0	7.8433	3.82e-29	2.12e-29	B739_0435	hypothetical protein
13716924	68.4821	0	7.0977	3.28e-19	1.25e-19	B739_0436	hypothetical protein
13716925	391.345	0	9.6123	2.71e-76	4.44e-76	B739_0437	hypothetical protein
13716926	388.626	140.728	1.4655	9.18e-46	8.38e-46	B739_0438	GTP cyclohydrolase
13716927	909.168	305.119	1.5752	1.23e-112	3.35e-112	B739_0439	cysteinyl-tRNA synthetase
13716936	179.814	0	10.174	3.35e-33	2.08e-33	B739_0448	hypothetical protein
13716939	189.135	83.5964	1.1779	1.12e-18	4.16e-19	B739_0451	hypothetical protein
13716943	22.2664	8.87336	1.3273	0.0012567	0.00019055	B739_0455	hypothetical protein
13716950	71.2007	0	7.1538	7.94e-20	3.1e-20	B739_0462	hypothetical protein
13716951	26.5384	6.38259	2.0559	1.09e-05	1.97e-06	B739_0463	hypothetical protein
13716959	60.3264	22.8839	1.3985	4.81e-08	1.04e-08	B739_0471	hypothetical protein
13716961	342.928	80.4829	2.0912	3.25e-57	3.65e-57	B739_0473	hypothetical protein
13716963	1181.67	462.816	1.3523	1.36e-124	4.17e-124	B739_0475	hypothetical protein
13716977	14.758	3.42481	2.1074	0.00090382	0.00013909	B739_0489	hypothetical protein
13716982	60.0675	11.8311	2.344	2.08e-12	5.74e-13	B739_0494	Histone acetyltransferase HPA2-related acetyltransferase
13716990	30.4221	0	5.927	6.62e-10	1.6e-10	B739_0502	hypothetical protein
13716993	151.463	62.7362	1.2716	1.97e-16	6.59e-17	B739_0505	hypothetical protein
13717003	319.497	0	11.003	1.67e-50	1.71e-50	B739_0515	hypothetical protein
13717004	48.4165	0	6.5974	1.74e-14	5.35e-15	B739_0516	hypothetical protein
13717005	17.2176	0	5.1058	3.12e-06	5.89e-07	B739_0517	hypothetical protein
13717006	273.411	25.5304	3.4208	5.31e-67	7.37e-67	B739_0518	hypothetical protein
13717007	128.938	0	8.0105	5.66e-32	3.36e-32	B739_0519	hypothetical protein
13717008	19.5478	0	5.2889	6.61e-07	1.31e-07	B739_0520	hypothetical protein
13717012	166.739	48.8813	1.7702	1.2e-24	5.53e-25	B739_0524	hypothetical protein
13717013	38.4484	0	6.3633	6.03e-12	1.63e-12	B739_0525	hypothetical protein
13717014	90.878	31.913	1.5098	3.09e-12	8.47e-13	B739_0526	cell wall-associated hydrolase
13717018	343.058	113.174	1.5999	2.59e-44	2.3e-44	B739_0530	hypothetical protein
13717023	270.304	2.80211	6.5919	2.15e-73	3.33e-73	B739_0535	transcriptional regulator/sugar kinase
13717026	166.092	0	8.3758	4.22e-39	3.23e-39	B739_0538	hypothetical protein
13717027	11.3921	0	4.51	0.00017563	2.89e-05	B739_0539	hypothetical protein
13717029	287.392	138.082	1.0575	9.82e-25	4.57e-25	B739_0541	hypothetical protein
13717030	535.559	82.6624	2.6957	8.56e-110	2.2e-109	B739_0542	hypothetical protein
13717034	475.75	55.5753	3.0977	3.46e-108	8.81e-108	B739_0546	hypothetical protein
13717038	195.608	38.1399	2.3586	4.64e-37	3.24e-37	B739_0550	Rossmann fold nucleotide-binding protein
13717039	179.296	41.5647	2.1089	5.68e-31	3.29e-31	B739_0551	hypothetical protein
13717040	223.57	5.13721	5.4436	1.87e-63	2.44e-63	B739_0552	hypothetical protein
13717041	20.3246	9.65173	1.0744	0.0058964	0.00083322	B739_0553	hypothetical protein
13717042	109.39	29.4222	1.8945	9.04e-18	3.18e-18	B739_0554	Dinucleotide-utilizing enzymes involved in molybdopterin and thiamine biosynthesis family 1
13717043	33.3996	16.19	1.0447	0.00050607	8.01e-05	B739_0555	hypothetical protein
13717046	193.536	0	8.5965	4.06e-44	3.56e-44	B739_0558	hypothetical protein
13717050	197.032	65.694	1.5846	6.3e-26	3.1e-26	B739_0562	hypothetical protein
13717055	94.8911	13.8549	2.7759	2.58e-21	1.06e-21	B739_0567	hypothetical protein
13717057	247.261	67.5621	1.8717	1.09e-37	7.74e-38	B739_0569	hypothetical protein
13717063	16.8293	8.095	1.0559	0.013048	0.0017847	B739_0575	Rhodanese-related sulfurtransferase
13717066	19.5478	8.40634	1.2175	0.0038936	0.00056503	B739_0578	Thiol-disulfide isomerase and thioredoxin
13717067	543.326	149.913	1.8577	4.23e-80	7.37e-80	B739_0579	(acyl-carrier-protein) S-malonyltransferase
13717071	1074.87	0	11.07	1.43e-163	5.79e-163	B739_0583	hypothetical protein
13717072	1262.58	0	11.986	4.39e-163	1.74e-162	B739_0584	hypothetical protein
13717079	9.32082	0	3.9039	0.00094688	0.00014542	-//-
13717083	54.3714	0	8.4482	9.2e-14	2.73e-14	B739_0595	hypothetical protein
13717084	50.4878	14.7889	1.7714	1.69e-08	3.72e-09	B739_0596	hypothetical protein
13717088	153.535	0	8.2624	9.71e-37	6.72e-37	B739_0600	hypothetical protein
13717089	78.1913	25.9974	1.5886	3.1e-11	7.98e-12	B739_0601	hypothetical protein
13717090	56.9605	0	6.8319	1.54e-16	5.2e-17	B739_0602	Rhodanese-related sulfurtransferase
13717107	49.5816	0	6.6317	9.07e-15	2.83e-15	B739_0619	hypothetical protein
13717108	154.311	67.2507	1.1982	8.82e-16	2.85e-16	B739_0620	hypothetical protein
13717116	68.8705	9.8074	2.8119	4.84e-16	1.58e-16	B739_0628	hypothetical protein
13717127	327.005	142.285	1.2005	1.01e-31	5.92e-32	B739_0639	hypothetical protein
13717130	137.094	59.1557	1.2126	2.37e-14	7.25e-15	B739_0642	Na+/H+ antiporter
13717141	89.9718	0	7.4914	5.89e-24	2.68e-24	B739_0653	hypothetical protein
13717142	41.2964	0	6.3679	1.02e-12	2.83e-13	B739_0654	hypothetical protein
13717144	749.808	0	9.6488	1.23e-143	4.41e-143	B739_0656	ATPase
13717145	239.623	0	8.9046	3.63e-52	3.82e-52	B739_0657	hypothetical protein
13717146	195.219	0	8.609	2.03e-44	1.81e-44	B739_0658	UDP-N-acetylmuramyl pentapeptide phosphotransferase/UDP-N-acetylglucosamine-1-phosphate transferase
13717147	116.251	11.2085	3.3746	2.91e-29	1.63e-29	B739_0659	hypothetical protein
13717156	232.891	107.881	1.1102	2.4e-21	9.91e-22	B739_0668	protease II
13717158	43.4971	9.65173	2.1721	7.53e-09	1.7e-09	B739_0670	hypothetical protein
13717160	824.892	131.388	2.6504	8.38e-166	3.45e-165	B739_0672	hypothetical protein
13717163	342.152	9.18471	5.2193	4.34e-96	9.83e-96	B739_0675	hypothetical protein
13717172	139.036	0	8.1193	5.92e-34	3.76e-34	B739_0684	hypothetical protein
13717183	74.0487	17.124	2.1125	9.87e-14	2.92e-14	B739_0695	3-dehydroquinate dehydratase
13717184	107.966	6.22692	4.1159	5.42e-30	3.06e-30	B739_0696	hypothetical protein
13717185	38.1895	4.0475	3.2381	2.11e-10	5.21e-11	B739_0697	hypothetical protein
13717193	70.4239	5.13721	3.777	1.94e-19	7.47e-20	B739_0706	hypothetical protein
13717196	80.7804	8.56202	3.238	2.46e-20	9.76e-21	B739_0710	hypothetical protein
13717199	38.5778	3.58048	3.4295	8.01e-11	2.02e-11	B739_0713	hypothetical protein
13717204	80.2626	25.686	1.6437	7.48e-12	2.01e-12	B739_0718	methyltransferase
13717205	143.178	64.1373	1.1586	2.77e-14	8.41e-15	B739_0719	hypothetical protein
13717208	142.013	0	8.1499	1.57e-34	1.02e-34	B739_0722	hypothetical protein
13717209	156.512	0	8.2901	2.65e-37	1.86e-37	B739_0723	hypothetical protein
13717210	162.726	0	8.3463	1.8e-38	1.32e-38	B739_0724	hypothetical protein
13717211	187.064	0	8.5474	5.96e-43	5.15e-43	B739_0725	hypothetical protein
13717212	41.5553	0	6.377	8.75e-13	2.46e-13	B739_0726	hypothetical protein
13717213	63.8217	4.0475	3.9789	3.72e-18	1.35e-18	B739_0727	Zn-dependent hydrolase, including glyoxylase
13717218	107.448	0	7.7475	1.24e-27	6.46e-28	B739_0732	hypothetical protein
13717219	272.116	0	9.0881	1.32e-57	1.52e-57	B739_0733	hypothetical protein
13717221	7.12007	0	3.8319	0.0040162	0.00058132	B739_0735	hypothetical protein
13717222	626.437	87.3326	2.8426	2.11e-133	6.92e-133	B739_0736	UDP-N-acetylmuramate dehydrogenase
13717225	85.4408	0	7.4169	5.6e-23	2.48e-23	B739_0739	hypothetical protein
13717232	79.2269	14.4776	2.4522	1.83e-16	6.15e-17	B739_0746	hypothetical protein
13717234	154.57	15.256	3.3408	4e-38	2.89e-38	B739_0748	hypothetical protein
13717235	229.266	17.2797	3.7299	3.77e-59	4.5e-59	B739_0749	hypothetical protein
13717247	81.5571	40.1636	1.0219	7.84e-08	1.67e-08	B739_0761	hypothetical protein
13717254	129.844	63.2032	1.0387	8.16e-12	2.18e-12	B739_0768	hypothetical protein
13717258	40.7786	0	5.4482	6.9e-13	1.94e-13	B739_0772	hypothetical protein
13717259	53.2063	9.18471	2.5343	7.84e-12	2.1e-12	B739_0773	hypothetical protein
13717260	68.8705	16.0343	2.1027	7.94e-13	2.24e-13	B739_0774	Anthranilate/para-aminobenzoate synthases component I
13717261	45.6979	13.0765	1.8051	6.03e-08	1.29e-08	B739_0775	hypothetical protein
13717263	26.6679	3.26913	3.0281	2.11e-07	4.31e-08	B739_0777	hypothetical protein
13717269	108.225	12.7652	3.0837	6.87e-26	3.34e-26	B739_0783	hypothetical protein
13717271	104.212	28.0211	1.8949	5.26e-17	1.8e-17	B739_0785	hypothetical protein
13717272	293.994	130.143	1.1757	4.3e-28	2.33e-28	B739_0786	hypothetical protein
13717273	90.2307	6.69394	3.7527	2.21e-24	1.01e-24	B739_0787	hypothetical protein
13717274	125.443	0	7.9709	2.8e-31	1.64e-31	B739_0788	hypothetical protein
13717275	128.032	0	8.0004	8.56e-32	5.04e-32	B739_0789	hypothetical protein
13717283	1552.05	759.373	1.0313	1.11e-122	3.35e-122	B739_0797	3-phosphoglycerate kinase
13717286	377.752	43.1214	3.131	6.48e-87	1.24e-86	B739_0800	hypothetical protein
13717288	64.3395	30.2006	1.0911	7.82e-07	1.54e-07	B739_0802	cytosine/adenosine deaminase
13717290	2213.31	0	12.112	9.52e-278	9.37e-277	B739_0804	hypothetical protein
13717291	749.549	0	10.55	5.5e-125	1.7e-124	B739_0805	hypothetical protein
13717292	13.8518	0	4.792	3.11e-05	5.44e-06	B739_0806	hypothetical protein
13717293	224.217	0	8.8088	1.6e-49	1.6e-49	B739_0807	hypothetical protein
13717294	27.0563	0	5.7579	5.33e-09	1.22e-09	B739_0808	hypothetical protein
13717302	7.8968	0	4.6647	0.0017103	0.00025658	B739_0817	hypothetical protein
13717303	96.574	0	7.5936	2.31e-25	1.1e-25	B739_0818	hypothetical protein
13717304	99.1631	0	7.6317	6.58e-26	3.21e-26	B739_0819	hypothetical protein
13717305	36.3771	0	6.185	1.82e-11	4.77e-12	B739_0820	hypothetical protein
13717314	220.463	66.7837	1.723	3.06e-31	1.79e-31	B739_0829	undecaprenyl pyrophosphate synthase
13717316	118.193	32.6913	1.8542	1.05e-18	3.9e-19	B739_0831	hypothetical protein
13717317	1057.01	501.578	1.0754	6.76e-88	1.31e-87	B739_0832	hypothetical protein
13717320	63.3039	0	6.9842	5.07e-18	1.82e-18	B739_0835	hypothetical protein
13717329	28.9981	10.7414	1.4328	0.00012671	2.11e-05	B739_0844	hypothetical protein
Novel00022	142.272	0	8.1525	1.4e-34	9.09e-35	-//-
sRNA00022	6.60224	0	3.723	0.005946	0.00083919	-//-
Yellow highlighting represents LptD homolog in CH-1
