# Supplementary material for: Role of LptD in Resistance to Glutaraldehyde and Pathogenicity in Riemerella anatipestifer
Source: Front Microbiol. 2019 Jun 21;10:1443. doi: 10.3389/fmicb.2019.01443 (PMC6598057; doi:10.3389/fmicb.2019.01443)
Supplement: Supplementary file 4 [file Data_Sheet_2.xlsx]

## Sheet: CH_1TSBvsCH_ATSB.DEG_down
Supplementary Table S2 Compared to R. anatipestifer ATCC11845, the down-regulated genes in CH-1 in TSB
Gene_id	readcount_CH_1TSB	readcount_CH_ATSB	log2.Fold_change.	pvalue	qvalue	Genename	Description
13715189	378.917	759.062	-1.0023	2.7555e-11	7.1372e-12	B739_0085	hypothetical protein
13715231	61.362	123.76	-1.0121	0.0063579	0.0008951	B739_0127	hypothetical protein
13715236	94.6322	335.942	-1.8278	1.8566e-20	7.4127e-21	B739_0132	GAF domain-containing protein
13715262	32.105	73.1663	-1.1884	0.0083021	0.0011566	B739_0158	hypothetical protein
13715277	123.112	335.631	-1.4469	5.1125e-13	1.4558e-13	B739_0173	hypothetical protein
13715278	98.5158	752.679	-2.9336	6.1536e-93	1.2899e-92	B739_0174	hypothetical protein
13715279	89.9718	496.597	-2.4645	1.2464e-48	1.211e-48	B739_0175	hypothetical protein
13715280	15.6641	151.158	-3.2705	1.1123e-22	4.8894e-23	B739_0176	hypothetical protein
13715304	94.1143	326.135	-1.793	3.1861e-19	1.2122e-19	B739_2171	hypothetical protein
13715318	848.453	2389.58	-1.4939	5.5016e-89	1.083e-88	B739_2185	Large-conductance mechanosensitive channel
13715333	8.02626	24.752	-1.6247	0.025708	0.0034194	B739_2200	GTPase subunit of restriction endonuclease
13715339	34.5647	105.546	-1.6105	5.0405e-06	9.2996e-07	B739_2206	hypothetical protein
13715376	222.146	782.568	-1.8167	6.1386e-45	5.5145e-45	B739_1831	hypothetical protein
13715385	8.54408	30.6676	-1.8437	0.0047353	0.00067889	-//-
13715396	136.058	333.14	-1.2919	3.4527e-10	8.4226e-11	B739_0855	NAD-dependent aldehyde dehydrogenase
13715402	19138.1	48909.3	-1.3537	0	0	B739_0861	hypothetical protein
13715404	207.388	605.879	-1.5467	1.2646e-25	6.1171e-26	B739_0863	redox protein, regulator of disulfide bond formation
13715406	62.5271	175.755	-1.491	6.3444e-08	1.3562e-08	B739_0865	hypothetical protein
13715407	85.9586	222.612	-1.3728	3.232e-08	7.0217e-09	B739_0866	hypothetical protein
13715429	665.791	1841.77	-1.4679	2.2423e-66	3.0396e-66	B739_0888	Biotin carboxyl carrier protein
13715431	812.723	1703.53	-1.0677	5.2153e-28	2.8044e-28	B739_0890	Ornithine/acetylornithine aminotransferase
13715432	130.88	393.853	-1.5894	3.5907e-18	1.3047e-18	B739_0891	hypothetical protein
13715434	65.7635	165.325	-1.3299	4.563e-06	8.4808e-07	B739_0893	hypothetical protein
13715437	78.7091	157.852	-1.004	0.0023368	0.00034575	B739_0896	Mannose-6-phosphate isomerase
13715442	168.422	406.618	-1.2716	1.0652e-11	2.837e-12	B739_0901	Fe-S oxidoreductase
13715443	77.2851	226.66	-1.5523	1.3201e-10	3.3057e-11	B739_0902	hypothetical protein
13715444	18.3827	48.7257	-1.4063	0.0077758	0.0010879	B739_0904	hypothetical protein
13715451	941.92	2154.36	-1.1936	4.0674e-47	3.8366e-47	B739_0911	3-oxoacyl-ACP synthase
13715460	397.429	923.764	-1.2168	3.65e-22	1.565e-22	B739_0920	seryl-tRNA synthetase
13715470	1731.99	4251.9	-1.2957	1.8832e-112	5.0751e-112	B739_0930	Biopolymer transport protein
13715471	1122.51	3142.1	-1.485	6.4099e-115	1.7915e-114	B739_0931	hypothetical protein
13715472	764.954	1594.4	-1.0596	8.9915e-26	4.3587e-26	B739_0932	hypothetical protein
13715473	2001.26	4479.18	-1.1623	1.2695e-89	2.5434e-89	B739_0933	hypothetical protein
13715485	1309.19	4569	-1.8032	4.9727e-250	4.1693e-249	B739_0945	hypothetical protein
13715491	31.3283	93.7152	-1.5808	2.5063e-05	4.4085e-06	B739_0951	hypothetical protein
13715492	109.39	376.729	-1.784	9.292e-22	3.8882e-22	B739_0952	hypothetical protein
13715496	394.711	1185.76	-1.5869	3.0498e-51	3.167e-51	B739_0956	Fructose/tagatose bisphosphate aldolase
13715507	1515.15	4078.32	-1.4285	3.9627e-136	1.3192e-135	B739_0967	50S ribosomal protein L3
13715508	1006	2516.61	-1.3229	1.0033e-70	1.4943e-70	B739_0968	50S ribosomal protein L4
13715509	240.27	770.27	-1.6807	4.628e-38	3.3366e-38	B739_0969	50S ribosomal protein L23
13715510	3115.22	8795.37	-1.4974	0	0	B739_0970	50S ribosomal protein L2
13715511	1085.23	2688.78	-1.309	1.5201e-73	2.3732e-73	B739_0971	50S ribosomal protein L22
13715512	1366.41	4047.19	-1.5665	6.3601e-166	2.6663e-165	B739_0972	30S ribosomal protein S3
13715513	823.857	2515.05	-1.6101	5.2341e-110	1.3619e-109	B739_0973	50S ribosomal protein L16/L10E
13715514	44.1444	134.969	-1.6123	2.3873e-07	4.847e-08	B739_0974	hypothetical protein
13715515	278.977	630.943	-1.1774	1.9154e-14	5.8595e-15	B739_0975	30S ribosomal protein S17
13715516	481.575	1225.77	-1.3479	6.5596e-37	4.5552e-37	B739_0976	50S ribosomal protein L14
13715517	351.602	901.502	-1.3584	4.4313e-28	2.3885e-28	B739_0977	50S ribosomal protein L24
13715518	1387.38	3438.35	-1.3094	1.2421e-93	2.6279e-93	B739_0978	50S ribosomal protein L5
13715522	636.405	1279.17	-1.0072	3.0218e-18	1.1034e-18	B739_0982	50S ribosomal protein L18
13715523	1156.3	2767.09	-1.2589	1.0222e-68	1.4646e-68	B739_0983	30S ribosomal protein S5
13715524	85.1819	214.05	-1.3293	1.8579e-07	3.8236e-08	B739_0984	Ribosomal protein L30/L7E
13715526	2578.63	6014.89	-1.2219	1.2381e-136	4.1832e-136	B739_0986	preprotein translocase subunit SecY
13715529	722.104	1485.28	-1.0405	6.1674e-23	2.7216e-23	B739_0989	30S ribosomal protein S13
13715530	528.438	1355.29	-1.3588	2.1162e-41	1.7295e-41	B739_0990	30S ribosomal protein S11
13715534	286.486	680.447	-1.248	9.0148e-18	3.1788e-18	B739_0994	hypothetical protein
13715537	1594.77	3450.34	-1.1134	7.8767e-62	9.9063e-62	B739_0997	enolase
13715546	489.343	1036.32	-1.0825	2.5687e-18	9.4552e-19	B739_1006	hypothetical protein
13715558	706.052	2892.4	-2.0344	3.3594e-199	1.7686e-198	B739_1019	carbonic anhydrase
13715571	92.8198	191.633	-1.0458	0.00036016	5.7702e-05	B739_1032	hypothetical protein
13715582	63.8217	137.926	-1.1118	0.00094312	0.00014495	B739_1043	hypothetical protein
13715589	714.984	1988.1	-1.4754	2.5529e-72	3.9049e-72	B739_1050	glutamate dehydrogenase
13715628	1613.54	3854.93	-1.2565	1.3193e-94	2.8443e-94	B739_1090	hypothetical protein
13715633	554.718	1720.34	-1.6329	4.5836e-78	7.8018e-78	B739_1096	hypothetical protein
13715634	1777.69	4157.25	-1.2256	1.1519e-95	2.5316e-95	B739_1097	Succinate dehydrogenase/fumarate reductase, flavoprotein subunit
13715635	651.551	2358.45	-1.8559	2.5017e-137	8.581e-137	B739_1098	Succinate dehydrogenase/fumarate reductase, Fe-S protein subunit
13715638	471.996	1049.24	-1.1525	8.6391e-22	3.6284e-22	B739_1101	CTP synthase
13715648	207.518	557.309	-1.4252	5.9388e-20	2.322e-20	B739_1111	hypothetical protein
13715658	745.018	2273.29	-1.6094	1.6189e-99	3.7398e-99	B739_1121	Glycine/serine hydroxymethyltransferase
13715662	575.172	1693.88	-1.5583	1.0951e-69	1.5994e-69	B739_1125	hypothetical protein
13715663	381.377	1030.71	-1.4344	5.0003e-36	3.3993e-36	B739_1126	Nucleoside-diphosphate-sugar epimerase
13715674	63.8217	131.077	-1.0383	0.0035135	0.00051249	B739_1137	hypothetical protein
13715675	89.195	183.227	-1.0386	0.00055532	8.7422e-05	B739_1138	dTDP-4-dehydrorhamnose 3,5-epimerase-related enzyme
13715691	195.09	490.837	-1.3311	2.6222e-15	8.3138e-16	B739_1154	NADH:ubiquinone oxidoreductase 27 kD subunit
13715693	347.589	844.837	-1.2813	4.4126e-23	1.9587e-23	B739_1156	NADH:ubiquinone oxidoreductase 24 kD subunit
13715694	814.924	1887.54	-1.2118	4.0603e-43	3.5217e-43	B739_1157	NADH:ubiquinone oxidoreductase, NADH-binding (51 kD) subunit
13715695	650.256	1823.24	-1.4874	1.1295e-67	1.5981e-67	B739_1158	hypothetical protein
13715696	451.93	1476.56	-1.7081	1.0332e-73	1.6243e-73	B739_1159	NADH:ubiquinone oxidoreductase subunit H
13715697	143.437	565.404	-1.9789	1.7505e-38	1.2908e-38	B739_1160	formate hydrogenlyase subunit 6/NADH:ubiquinone oxidoreductase 23 kD subunit
13715698	73.1425	304.808	-2.0591	5.2953e-23	2.3459e-23	B739_1161	NADH:ubiquinone oxidoreductase subunit J
13715699	28.3508	105.858	-1.9007	6.5208e-08	1.3926e-08	B739_1162	NADH:ubiquinone oxidoreductase subunit K
13715700	674.465	1787.44	-1.4061	1.674e-58	1.9841e-58	B739_1163	NADH:ubiquinone oxidoreductase subunit L/multisubunit Na+/H+ antiporter, MnhA subunit
13715701	403.125	1327.58	-1.7195	2.3919e-67	3.3424e-67	B739_1164	hypothetical protein
13715702	431.864	896.988	-1.0545	5.4731e-15	1.7208e-15	B739_1165	hypothetical protein
13715703	241.694	505.626	-1.0649	2.6464e-09	6.2082e-10	B739_1166	peroxiredoxin
13715709	113.533	330.338	-1.5408	1.4313e-14	4.4086e-15	B739_1172	hypothetical protein
13715721	229.396	1041.76	-2.1831	2.3365e-82	4.1998e-82	B739_1184	Acetyl-CoA acetyltransferase
13715724	161.302	348.241	-1.1103	1.5601e-07	3.2402e-08	B739_1187	hypothetical protein
13715734	306.422	765.911	-1.3217	1.2114e-22	5.3148e-23	B739_1197	hypothetical protein
13715736	78.968	167.037	-1.0808	0.00047329	7.5189e-05	B739_1199	CMP-2-keto-3-deoxyoctulosonic acid synthetase
13715737	63.9512	191.166	-1.5798	1.8006e-09	4.2416e-10	B739_1200	hypothetical protein
13715738	59.2907	154.583	-1.3825	3.3888e-06	6.3823e-07	B739_1201	glutathione peroxidase
13715740	51.135	396.499	-2.9549	2.7777e-50	2.8072e-50	B739_1203	Pentose-5-phosphate-3-epimerase
13715746	711.877	1748.83	-1.2967	2.3312e-47	2.2362e-47	B739_1209	NRAMP family Mn2+/Fe2+ transporter
13715751	927.162	2016.59	-1.121	1.6136e-37	1.1416e-37	B739_1214	Pyruvate/2-oxoglutarate dehydrogenase complex, dihydrolipoamide dehydrogenase (E3) component,-related enzyme
13715753	367.266	743.339	-1.0172	1.5822e-11	4.1552e-12	B739_1216	2-keto-4-pentenoate hydratase
13715755	424.615	967.975	-1.1888	7.3793e-22	3.1225e-22	B739_1218	hypothetical protein
13715769	44.015	95.4276	-1.1164	0.0056604	0.00080238	B739_1232	hypothetical protein
13715781	92.302	287.372	-1.6385	1.7289e-14	5.3106e-15	B739_1244	Organic radical activating enzyme
13715787	98.3864	372.837	-1.922	1.1784e-24	5.4554e-25	B739_1250	Methionyl-tRNA formyltransferase
13715789	1423.11	3259.79	-1.1957	9.5925e-71	1.4381e-70	B739_1252	Malate/lactate dehydrogenase
13715795	11.9099	37.9842	-1.6732	0.0043677	0.00062899	B739_1258	hypothetical protein
13715796	124.278	333.919	-1.4259	1.415e-12	3.9111e-13	B739_1259	hypothetical protein
13715863	1782.74	4252.21	-1.2541	1.0844e-103	2.6683e-103	B739_1326	succinyl-CoA synthetase subunit alpha
13715876	86.2175	183.85	-1.0925	0.00019598	3.2173e-05	B739_1339	Lipoprotein
13715882	2741.61	5996.06	-1.129	2.1879e-110	5.7594e-110	B739_1345	Glyceraldehyde-3-phosphate dehydrogenase/erythrose-4-phosphate dehydrogenase
13715884	24.985	56.5093	-1.1774	0.021963	0.0029358	B739_1347	hypothetical protein
13715902	3.23639	21.1715	-2.7097	0.0011649	0.00017686	B739_1365	hypothetical protein
13715912	58.9024	126.251	-1.0999	0.001833	0.00027371	B739_1375	hypothetical protein
13715936	68.9999	290.174	-2.0723	3.2936e-22	1.4202e-22	B739_1399	hypothetical protein
13715942	213.473	674.531	-1.6598	1.0156e-32	6.1804e-33	B739_1405	hypothetical protein
13715965	964.446	3162.19	-1.7132	9.8896e-157	3.86e-156	B739_1428	metalloendopeptidase
13715999	6.99061	27.2428	-1.9624	0.0047259	0.00067798	B739_1465	hypothetical protein
13716015	2476.62	8259.7	-1.7377	0	0	B739_1483	Bacterial nucleoid DNA-binding protein
13716016	52.9474	110.684	-1.0638	0.0054304	0.00077075	B739_1484	aspartate 1-decarboxylase
13716038	172.823	383.111	-1.1485	8.0697e-09	1.8141e-09	B739_1506	hypothetical protein
13716047	415.812	1793.35	-2.1087	2.6396e-132	8.5365e-132	B739_1517	hypothetical protein
13716056	363.9	1194.17	-1.7144	2.1116e-60	2.598e-60	B739_1525	Outer membrane protein-related peptidoglycan-associated (lipo)protein
13716057	503.324	1130.65	-1.1676	3.8285e-24	1.7544e-24	B739_1526	Acetylornithine deacetylase/Succinyl-diaminopimelate desuccinylase-related deacylase
13716058	126.219	286.594	-1.1831	2.0677e-07	4.2323e-08	B739_1527	hypothetical protein
13716086	1638.26	3639.48	-1.1516	2.4007e-71	3.6231e-71	B739_1555	50S ribosomal protein L9
13716093	699.708	2022.66	-1.5314	8.1097e-80	1.4014e-79	B739_1562	Superfamily II DNA and RNA helicase
13716094	137.353	403.504	-1.5547	8.8832e-18	3.1373e-18	B739_1563	Cold shock protein
13716102	438.078	947.582	-1.1131	3.8067e-18	1.3788e-18	B739_1571	Carbamoylphosphate synthase large subunit
13716130	64.8573	139.95	-1.1096	0.0008944	0.00013783	B739_1599	hypothetical protein
13716134	353.026	1169.73	-1.7283	3.6801e-60	4.5033e-60	B739_1603	F0F1-type ATP synthase, subunit c/Archaeal/vacuolar-type H+-ATPase, subunit K
13716139	194.831	392.763	-1.0114	1.1949e-06	2.3239e-07	B739_1608	Hemolysins-related protein containing CBS domains
13716140	11.5216	51.8391	-2.1697	2.0025e-05	3.5556e-06	B739_1609	hypothetical protein
13716143	1273.84	2977.87	-1.2251	6.2205e-69	9.027e-69	B739_1612	Pyruvate/2-oxoglutarate dehydrogenase complex, dihydrolipoamide acyltransferase (E2) component,-related enzyme
13716161	1237.86	2504.31	-1.0166	3.9155e-35	2.5918e-35	B739_1630	Acyl-CoA dehydrogenase
13716220	192.242	439.932	-1.1944	7.1872e-11	1.8241e-11	B739_1690	UDP-glucose 4-epimerase
13716222	55.1482	131.077	-1.249	0.00016221	2.6824e-05	B739_1692	hypothetical protein
13716232	729.095	1805.18	-1.308	7.3929e-50	7.4382e-50	B739_1702	Nucleoside-diphosphate-sugar epimerase
13716251	135.929	836.898	-2.6222	1.8115e-88	3.5353e-88	B739_1728	hypothetical protein
13716273	7.8968	79.5489	-3.3325	6.6215e-13	1.869e-13	B739_1750	hypothetical protein
13716277	134.634	366.61	-1.4452	4.7701e-14	1.4341e-14	B739_1754	hypothetical protein
13716304	195.09	450.518	-1.2074	2.2202e-11	5.7905e-12	B739_1781	hypothetical protein
13716345	136.835	324.89	-1.2475	3.0485e-09	7.0928e-10	B739_1822	hypothetical protein
13716346	335.29	926.099	-1.4658	4.0062e-34	2.5547e-34	B739_1823	triosephosphate isomerase
13716378	3.10694	15.5673	-2.325	0.013262	0.0018129	B739_1855	hypothetical protein
13716379	11.7805	51.9948	-2.142	2.4043e-05	4.2357e-06	B739_1856	tryptophan synthase subunit alpha
13716380	20.0656	102.744	-2.3563	1.2569e-10	3.1511e-11	B739_1857	hypothetical protein
13716381	14.1107	105.546	-2.903	2.8794e-14	8.7377e-15	B739_1858	hypothetical protein
13716382	16.182	92.1584	-2.5097	1.5341e-10	3.8282e-11	B739_1859	hypothetical protein
13716418	96.574	289.396	-1.5833	1.1814e-13	3.487e-14	B739_1896	Folate-dependent phosphoribosylglycinamide formyltransferase PurN
13716431	687.928	2904.7	-2.0781	9.7094e-208	5.4951e-207	B739_1909	hypothetical protein
13716439	139.424	297.335	-1.0926	2.1678e-06	4.1378e-07	B739_1917	hypothetical protein
13716539	536.724	1459.28	-1.443	5.6188e-51	5.8081e-51	B739_2018	peroxiredoxin
13716541	51.5234	109.127	-1.0827	0.0046214	0.00066383	B739_2020	hypothetical protein
13716554	1627.39	3943.04	-1.2768	1.123e-100	2.6481e-100	B739_2033	hypothetical protein
13716597	160.914	331.584	-1.0431	2.9428e-06	5.5609e-07	B739_2076	hypothetical protein
13716647	5.82551	61.6465	-3.4036	1.5355e-10	3.8282e-11	B739_2126	hypothetical protein
13716653	24.985	108.971	-2.1248	1.2657e-09	3.0161e-10	B739_2132	hypothetical protein
13716654	15.5347	101.187	-2.7035	1.3624e-12	3.7705e-13	B739_2133	hypothetical protein
13716677	244.671	571.009	-1.2227	1.8885e-14	5.7852e-15	B739_2156	hypothetical protein
13716696	78.1913	182.293	-1.2212	1.564e-05	2.801e-06	B739_0204	hypothetical protein
13716704	247.649	719.521	-1.5387	8.4392e-30	4.7524e-30	B739_0213	hypothetical protein
13716728	2303.28	4820.41	-1.0655	9.0309e-76	1.4708e-75	B739_0237	cysteine synthase
13716729	968.329	2634.92	-1.4442	8.6094e-91	1.7402e-90	B739_0238	serine acetyltransferase
13716735	25.1144	59.6228	-1.2473	0.011109	0.0015307	B739_0244	hypothetical protein
13716753	9498.17	50426.4	-2.4085	0	0	B739_0262	hypothetical protein
13716757	43.6266	314.304	-2.8489	2.1515e-38	1.5762e-38	B739_0266	hypothetical protein
13716758	142.919	704.265	-2.3009	2.6625e-61	3.33e-61	B739_0267	phage shock protein A (IM30), suppresses sigma54-dependent transcription
13716759	47.2514	241.605	-2.3542	6.3865e-23	2.8128e-23	B739_0268	hypothetical protein
13716760	359.11	2204.49	-2.6179	2.3594e-229	1.571e-228	B739_0269	hypothetical protein
13716761	606.112	2678.04	-2.1435	2.5191e-202	1.3578e-201	B739_0270	hypothetical protein
13716766	40.5197	98.3853	-1.2798	0.00074971	0.00011657	B739_0275	hypothetical protein
13716768	65.893	174.042	-1.4012	5.4698e-07	1.0881e-07	B739_0277	Membrane protein related to metalloendopeptidase
13716796	294.512	1112.75	-1.9177	6.5928e-70	9.7548e-70	B739_0306	ATP-dependent exoDNAse subunit beta
13716810	275.611	576.769	-1.0654	1.9997e-10	4.9584e-11	B739_0320	hypothetical protein
13716831	34.1763	72.5436	-1.0859	0.0204	0.0027358	B739_0342	Quinolinate synthase
13716838	1698.72	6019.88	-1.8253	0	0	B739_0349	hypothetical protein
13716839	773.11	4245.98	-2.4574	0	0	B739_0350	hypothetical protein
13716855	4239.68	14339.2	-1.7579	0	0	B739_0367	hypothetical protein
13716869	49.8405	299.982	-2.5895	2.8387e-32	1.6956e-32	B739_0381	hypothetical protein
13716883	1545.83	3734.44	-1.2725	1.1824e-94	2.5737e-94	B739_0395	hypothetical protein
13716885	374.774	1067.61	-1.5103	1.0589e-41	8.7804e-42	B739_0397	IMP dehydrogenase/GMP reductase
13716894	267.456	971.711	-1.8612	5.746e-58	6.7398e-58	B739_0406	hypothetical protein
13716915	78.4502	157.541	-1.0059	0.0022914	0.00033971	B739_0427	hypothetical protein
13716929	36.2476	175.443	-2.275	3.154e-16	1.0348e-16	B739_0441	hypothetical protein
13716934	654.658	1586.93	-1.2774	1.3312e-41	1.0958e-41	B739_0446	Superoxide dismutase
13716937	252.439	608.214	-1.2686	1.1379e-16	3.862e-17	B739_0449	hypothetical protein
13716940	87.6416	245.341	-1.4851	1.9929e-10	4.9469e-11	B739_0452	enoyl-CoA hydratase/carnithine racemase
13716941	28.4803	164.235	-2.5277	8.4628e-18	2.9935e-18	B739_0453	Deoxycytidylate deaminase
13716946	214.897	556.531	-1.3728	2.2893e-18	8.4544e-19	B739_0458	hypothetical protein
13716955	30.8105	65.694	-1.0923	0.026035	0.0034609	B739_0467	acetyltransferase
13716969	8835.62	17969.3	-1.0241	8.8038e-249	6.8725e-248	B739_0481	translation elongation factor
13716978	173.212	1561.71	-3.1725	2.5777e-210	1.5356e-209	B739_0490	DNA-binding ferritin-like protein
13716983	1114.23	2395.34	-1.1042	1.789e-42	1.5225e-42	B739_0495	Catalase (peroxidase I)
13716988	64.8573	132.478	-1.0304	0.0037198	0.00054084	B739_0500	hypothetical protein
13716992	93.726	250.011	-1.4155	1.235e-09	2.946e-10	B739_0504	hypothetical protein
13716996	40.1313	109.749	-1.4514	3.4047e-05	5.9244e-06	B739_0508	hypothetical protein
13716997	61.362	263.554	-2.1027	8.2646e-21	3.341e-21	B739_0509	hypothetical protein
13716998	51.9118	134.813	-1.3768	1.5807e-05	2.8288e-06	B739_0510	hypothetical protein
13717000	164.538	413.935	-1.331	3.8475e-13	1.1082e-13	B739_0512	porphobilinogen deaminase
13717010	253.992	757.038	-1.5756	7.6072e-33	4.6419e-33	B739_0522	hypothetical protein
13717020	203.116	410.198	-1.014	6.276e-07	1.2452e-07	B739_0532	hypothetical protein
13717021	414.388	1024.17	-1.3054	6.9774e-29	3.8432e-29	B739_0533	cell morphogenesis ATPase
13717051	101.364	217.32	-1.1003	4.3069e-05	7.4428e-06	B739_0563	hypothetical protein
13717056	322.733	654.761	-1.0206	2.0422e-10	5.0527e-11	B739_0568	hypothetical protein
13717064	2.20075	11.2085	-2.3485	0.034105	0.0044966	B739_0576	hypothetical protein
13717065	24.8555	116.443	-2.228	6.2313e-11	1.585e-11	B739_0577	Rhodanese-related sulfurtransferase
13717075	75.2138	200.663	-1.4157	5.2081e-08	1.1229e-08	B739_0587	hypothetical protein
13717092	651.421	2218.18	-1.7677	1.2967e-117	3.7159e-117	B739_0604	hypothetical protein
13717093	392.898	942.444	-1.2623	1.1414e-24	5.2948e-25	B739_0605	hypothetical protein
13717094	116.899	331.895	-1.5055	5.7143e-14	1.7088e-14	B739_0606	hypothetical protein
13717112	2.45966	19.3035	-2.9723	0.0009582	0.00014706	B739_0624	hypothetical protein
13717113	98.5158	458.146	-2.2174	3.5942e-38	2.6162e-38	B739_0625	hypothetical protein
13717118	530.898	1088.62	-1.036	5.0016e-17	1.7182e-17	B739_0630	Phosphoribosylpyrophosphate synthetase
13717126	137.094	308.077	-1.1681	1.2053e-07	2.5312e-08	B739_0638	hypothetical protein
13717153	50.2288	127.652	-1.3456	4.3865e-05	7.5746e-06	B739_0665	hypothetical protein
13717154	43.3677	109.438	-1.3354	0.00017801	2.9308e-05	B739_0666	50S ribosomal protein L33
13717162	49.4521	140.261	-1.504	1.0639e-06	2.0727e-07	B739_0674	riboflavin synthase subunit beta
13717166	1365.5	5258.48	-1.9452	0	0	B739_0678	hypothetical protein
13717167	614.397	2632.27	-2.0991	8.6982e-192	4.3758e-191	B739_0679	hypothetical protein
13717168	384.484	1528.55	-1.9912	3.8902e-102	9.4695e-102	B739_0680	hypothetical protein
13717169	1441.75	6798.55	-2.2374	0	0	B739_0681	hypothetical protein
13717170	4377.29	16321.2	-1.8986	0	0	B739_0682	Fe-S-cluster-containing hydrogenase components 2
13717171	2065.86	4317.9	-1.0636	1.0577e-67	1.506e-67	B739_0683	hypothetical protein
13717174	44.015	146.8	-1.7378	5.6638e-09	1.2964e-09	B739_0686	hypothetical protein
13717175	8.02626	31.6016	-1.9772	0.0021832	0.00032473	B739_0687	hypothetical protein
13717176	22.6548	327.692	-3.8545	1.2287e-55	1.3635e-55	B739_0688	ABC transporter ATPase
13717177	7.12007	40.475	-2.5071	2.2435e-05	3.9742e-06	B739_0689	hypothetical protein
13717180	1092.09	2929.92	-1.4238	1.5476e-97	3.5389e-97	B739_0692	Membrane carboxypeptidase (penicillin-binding protein)
13717189	100.846	245.963	-1.2863	8.1463e-08	1.7284e-08	B739_0702	hypothetical protein
13717201	13.3339	542.52	-5.3465	4.7275e-111	1.2591e-110	B739_0715	hypothetical protein
13717202	77.0262	978.561	-3.6672	5.285e-155	2.0278e-154	B739_0716	hypothetical protein
13717224	1033.32	3428.85	-1.7304	2.7796e-173	1.2338e-172	B739_0738	Ribosomal protein
13717226	154.829	324.267	-1.0665	1.7801e-06	3.4297e-07	B739_0740	Thiol-disulfide isomerase and thioredoxin
13717236	586.176	1231.22	-1.0707	7.6547e-21	3.1055e-21	B739_0750	hypothetical protein
13717238	257.746	791.286	-1.6182	3.4652e-36	2.37e-36	B739_0752	hypothetical protein
13717239	156.771	471.534	-1.5887	1.9966e-21	8.2933e-22	B739_0753	transthyretin-like protein
13717240	224.217	2017.83	-3.1698	6.9057e-271	6.0128e-270	B739_0754	hypothetical protein
13717241	96.3151	398.367	-2.0483	2.6841e-29	1.5041e-29	B739_0755	hypothetical protein
13717243	595.626	1726.1	-1.535	1.001e-68	1.4433e-68	B739_0757	Fe-S cluster assembly ABC transporter permease
13717249	139.294	353.222	-1.3424	1.2194e-11	3.2286e-12	B739_0763	DnaK suppressor protein
13717256	226.418	475.425	-1.0702	6.1025e-09	1.3926e-09	B739_0770	hypothetical protein
13717279	472.902	1020.75	-1.11	2.7358e-19	1.0426e-19	B739_0793	hypothetical protein
13717296	111.461	401.169	-1.8477	1.3398e-24	6.1775e-25	B739_0810	hypothetical protein
13717310	270.951	616.309	-1.1856	2.2008e-14	6.7237e-15	B739_0825	hypothetical protein
13717323	208.812	427.634	-1.0342	1.5947e-07	3.309e-08	B739_0838	Peptide methionine sulfoxide reductase
13717325	45.5684	138.86	-1.6075	1.7549e-07	3.628e-08	B739_0840	GTPase
13717326	370.502	849.041	-1.1964	1.1421e-19	4.4273e-20	B739_0841	hypothetical protein
Novel00002	26.5384	205.177	-2.9507	8.5421e-27	4.3261e-27	-//-
Novel00003	33.6585	280.211	-3.0575	1.3987e-37	9.9259e-38	-//-
Novel00004	80.7804	453.787	-2.4899	2.8236e-45	2.5569e-45	-//-
Novel00005	27.4446	144.62	-2.3977	1.0034e-14	3.1245e-15	-//-
Novel00008	79.4858	184.94	-1.2183	1.4431e-05	2.5887e-06	-//-
Novel00009	42.0731	201.908	-2.2627	2.7298e-18	1.0016e-18	-//-
Novel00014	67.8348	319.13	-2.234	2.015e-27	1.0414e-27	-//-
Novel00015	140.201	566.961	-2.0158	7.3948e-40	5.8126e-40	-//-
Novel00017	21.2307	110.684	-2.3822	1.6361e-11	4.2919e-12	-//-
Novel00018	53.3358	236.779	-2.1504	1.5071e-19	5.8025e-20	-//-
Novel00019	48.8048	133.412	-1.4508	4.94e-06	9.1292e-07	-//-
sRNA00016	13353.6	27453.2	-1.0397	0	0	-//-
